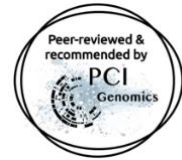

# 1 The slowly evolving genome of the xenacoelomorph worm

## 2 *Xenoturbella bocki*

3 Philipp H. Schiffer<sup>1,2,\*</sup>, Paschalis Natsidis<sup>1</sup>, Daniel J. Leite<sup>1,3</sup>, Helen E. Robertson<sup>1</sup>,  
4 François Lapraz<sup>1,4</sup>, Ferdinand Marlétaz<sup>1</sup>, Bastian Fromm<sup>5</sup>, Liam Baudry<sup>6</sup>, Fraser  
5 Simpson<sup>1</sup>, Eirik Høye<sup>7,8</sup>, Anne-C. Zakrzewski<sup>1,9</sup>, Paschalia Kapli<sup>1</sup>, Katharina J. Hoff<sup>10,11</sup>, Steven  
6 Mueller<sup>1,12</sup>, Martial Marbouty<sup>13</sup>, Heather Marlow<sup>14</sup>, Richard R. Copley<sup>15</sup>, Romain Koszul<sup>13</sup>, Peter  
7 Sarkies<sup>16</sup>, Maximilian J. Telford<sup>1,\*</sup>

8

9 \*Corresponding authors: [p.schiffer@uni-koeln.de](mailto:p.schiffer@uni-koeln.de), [m.telford@ucl.ac.uk](mailto:m.telford@ucl.ac.uk)

10

11 1 Center for Life's Origins and Evolution, Department of Genetics, Evolution and Environment,  
12 University College London, London WC1E 6BT, UK

13 2 Institute for Zoology, University of Cologne, 50674 Cologne, Germany

14 3 Department of Biosciences, Durham University, Durham DH1 3LE, UK

15 4 Université Côte D'Azur, CNRS, Inserm, iBV, Nice, France

16 5 The Arctic University Museum of Norway, UiT – The Arctic University of Norway, Tromsø, Norway

17 6 Collège Doctoral, Sorbonne Université, F-75005 Paris, France

18 7 Department of Tumor Biology, Institute for Cancer Research, The Norwegian Radium Hospital, Oslo  
19 University Hospital, Oslo, Norway

20 8 Institute of Clinical Medicine, Medical Faculty, University of Oslo, Oslo, Norway

21 9 Museum für Naturkunde, Leibniz Institute for Evolution and Biodiversity Science, Invalidenstr. 43,  
22 10115 Berlin, Germany

23 10 University of Greifswald, Institute for Mathematics and Computer Science, Greifswald, Germany

24 11 University of Greifswald, Center for Functional Genomics of Microbes, Greifswald, Germany

25 12 Royal Brompton Hospital, Guy's and St Thomas' NHS Foundation Trust

26 13 Institut Pasteur, Université de Paris, CNRS UMR3525, Unité Régulation Spatiale des Génomes, F-  
27 75015 Paris, France

28 14 The University of Chicago, Division of Biological Sciences, Chicago, IL 60637, USA

29 15 Laboratoire de Biologie du Développement de Villefranche-sur-mer (LBDV), Sorbonne Université,  
30 CNRS, 06230 Villefranche-sur-mer, France

31 16 Department of Biochemistry, University of Oxford, Oxford, UK

32

## 33 Abstract

34 The evolutionary origins of Bilateria remain enigmatic. One of the  
35 more enduring proposals highlights similarities between a  
36 cnidarian-like planula larva and simple acoel-like flatworms. This idea is based in part  
37 on the view of the Xenacoelomorpha as an outgroup to all other bilaterians which are  
38 themselves designated the Nephrozoa (protostomes and deuterostomes). Genome  
39 data can help to elucidate phylogenetic relationships and provide important  
40 comparative data. Here we assemble and analyse the genome of the simple, marine  
41 xenacoelomorph *Xenoturbella bocki*, a key species for our understanding of early  
42 bilaterian and deuterostome evolution. Our highly contiguous genome assembly of *X.*  
43 *bocki* has a size of ~111 Mbp in 18 chromosome like scaffolds, with repeat content  
44 and intron, exon and intergenic space comparable to other bilaterian invertebrates.

45 We find *X. bocki* to have a similar number of genes to other bilaterians and to have  
46 retained ancestral metazoan synteny. Key bilaterian signalling pathways are also  
47 largely complete and most bilaterian miRNAs are present. We conclude that *X. bocki*  
48 has a complex genome typical of bilaterians, in contrast to the apparent simplicity of  
49 its body plan. Overall, our data do not provide evidence supporting the idea that  
50 Xenacoelomorpha are a primitively simple outgroup to other bilaterians and gene  
51 presence/absence data support a relationship with Ambulacraria.

52

## 53 **Introduction**

54 *Xenoturbella bocki* (Fig 1) is a morphologically simple marine worm first described  
55 from specimens collected from muddy sediments in the Gullmarsfjord on the West  
56 coast of Sweden. There are now 6 described species of *Xenoturbella* - the only genus  
57 in the higher-level taxon of Xenoturbellida<sup>1</sup>. *X. bocki* was initially included as a species  
58 within the Platyhelminthes<sup>2</sup>, but molecular phylogenetic studies have shown that  
59 Xenoturbellida is the sister group of the Acoelomorpha, a second clade of  
60 morphologically simple worms also originally considered Platyhelminthes:  
61 Xenoturbellida and Acoelomorpha constitute their own phylum, the  
62 Xenacoelomorpha<sup>3,4</sup>. The monophyly of Xenacoelomorpha is convincingly supported  
63 by their sharing unique amino acid signatures in their Caudal genes<sup>3</sup> and Hox4/5/6  
64 gene<sup>5</sup>. In the present work we analyse our data in this phylogenetic framework of a  
65 monophyletic taxon Xenacoelomorpha.

66 The simplicity of xenacoelomorph species compared to other bilaterians is a  
67 central feature of discussions over their evolution. While Xenacoelomorpha are clearly  
68 monophyletic, their phylogenetic position within the Metazoa has been controversial  
69 for a quarter of a century. There are two broadly discussed scenarios: a majority of  
70 studies have supported a position for Xenacoelomorpha as the sister group of all other  
71 Bilateria (the Protostomia and Deuterostomia, collectively named Nephrozoa)<sup>4,6-8</sup>;  
72 work we have contributed to<sup>1,3,9,10</sup>, has instead placed Xenacoelomorpha within the  
73 Bilateria as the sister group of the Ambulacraria (Hemichordata and Echinodermata)  
74 to form a clade called the Xenambulacraria<sup>9</sup>.

75 *Xenoturbella bocki* has neither organized gonads nor a centralized nervous  
76 system. It has a blind gut, no body cavities and lacks nephrocytes<sup>11</sup>. If  
77 Xenacoelomorpha is the sister group to Nephrozoa these character absences can be

1a

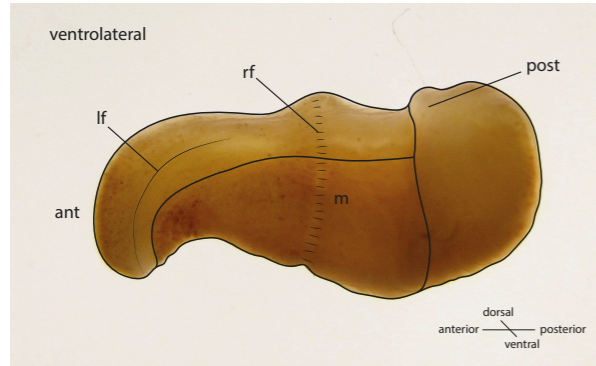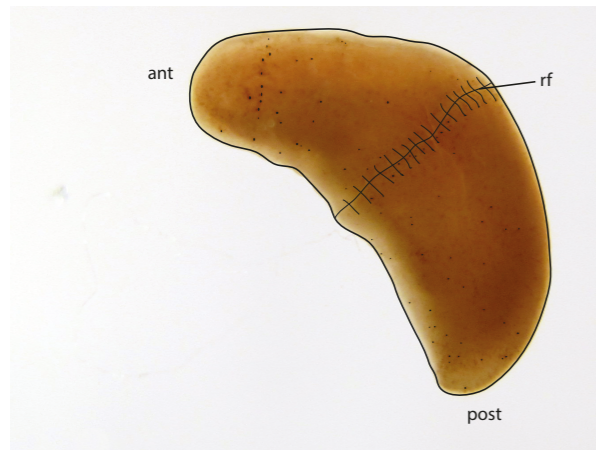

1b

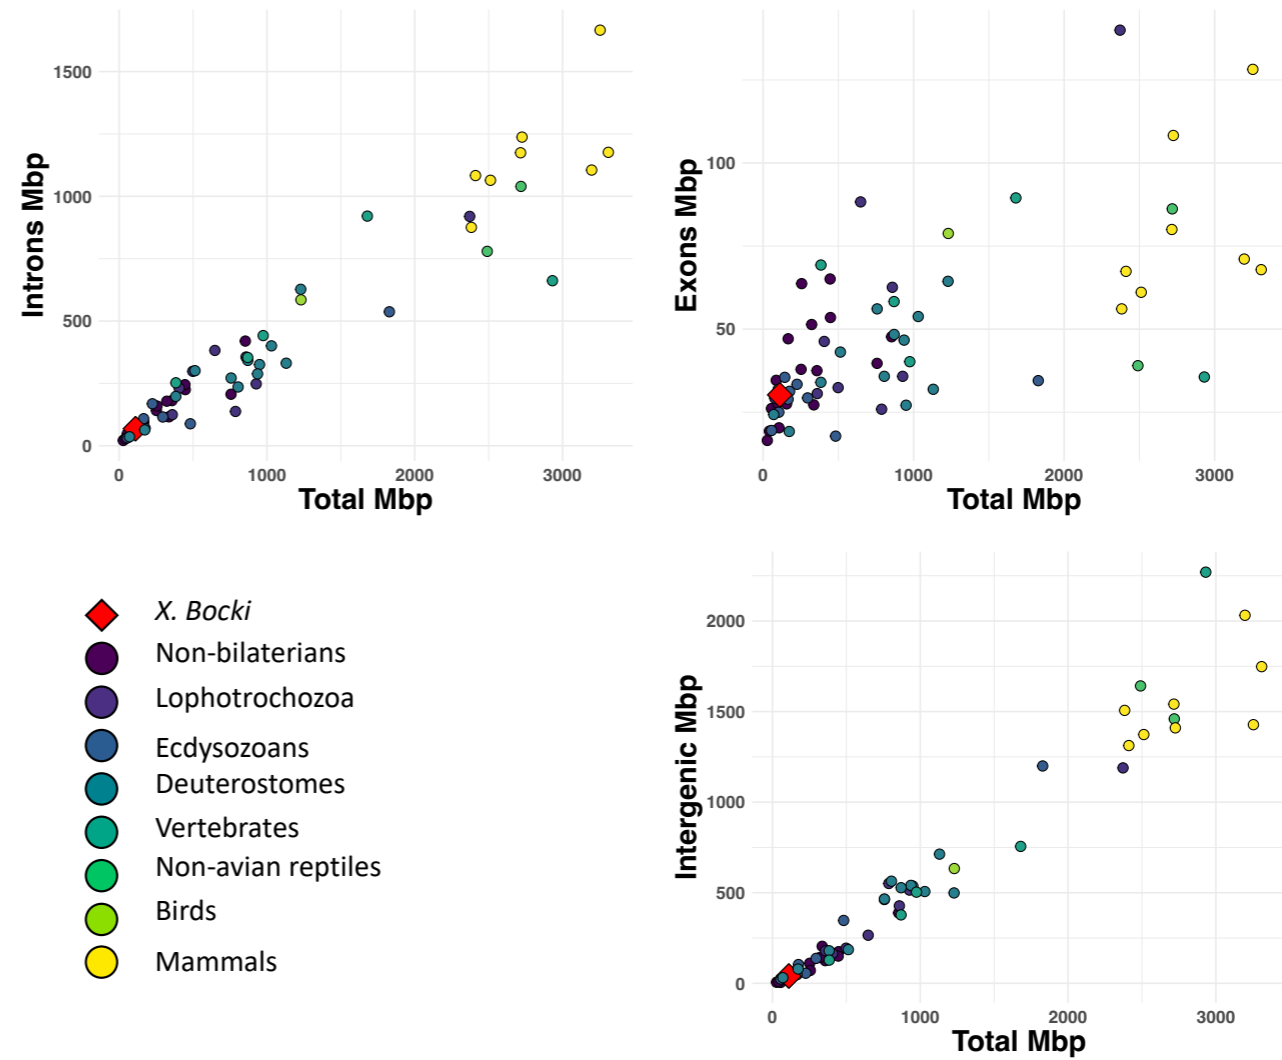

Figure 1: (a) Schematic drawings of *Xenoturbella bocki* showing the simple body organisation of the marine vermiform animal. Abbreviations: ant - anterior, post - posterior, lf - lateral furrow, rf - ring furrow, m - mouth opening. (b) A comparison of total length of exons, introns, and intergenic space in the *X. bocki* genome with other metazoans (data from ref 20). *X. bocki* does not appear to be an outlier in any of these comparisons.

78 parsimoniously interpreted as representing the primitive state of the Bilateria.  
79 According to advocates of the Nephrozoa hypothesis, these and other characters  
80 absent in Xenacoelomorpha must have evolved in the lineage leading to Nephrozoa  
81 after the divergence of Xenacoelomorpha. More generally there has been a tendency  
82 to interpret Xenacoelomorpha (especially Acoelomorpha) as living approximations of  
83 Urbilateria<sup>12</sup>.

84 An alternative explanation for the simple body plan of xenacoelomorphs is  
85 that it is derived from that of more complex urbilaterian ancestors through loss of  
86 morphological characters. The loss or remodelling of morphological complexity is a  
87 common feature of evolution in many animal groups and is typically associated with  
88 unusual modes of living<sup>13,14</sup> – in particular the adoption of a sessile (sea squirts,  
89 barnacles) or parasitic (neodermatan flatworms, orthonectids) lifestyle, extreme  
90 miniaturization (e.g. tardigrades, orthonectids), or even neoteny (e.g. flightless  
91 hexapods).

92 In the past some genomic features gleaned from analysis of various  
93 Xenacoelomorpha have been used to test these evolutionary hypotheses. For  
94 example, the common ancestor of the protostomes and deuterostomes has been  
95 reconstructed with approximately 8 Hox genes but only 4 have been found in the  
96 Acoelomorpha (*Nemertoderma*) and 5 in *Xenoturbella*. This has been interpreted as  
97 a primary absence with the full complement of 8 appearing subsequent to the  
98 divergence of Xenacoelomorpha and Nephrozoa. Similarly, analysis of the microRNAs  
99 (miRNAs) of an acoelomorph, *Symsagittifera roscoffensis*, found that many bilaterian  
100 miRNAs were absent from its genome<sup>15</sup>. Some of the missing bilaterian miRNAs,  
101 however, were subsequently observed in *Xenoturbella*<sup>9</sup>.

102 The few xenacoelomorph genomes available to date are from the acoel  
103 *Hofstenia miamia*<sup>16</sup> – like other Acoelomorpha it shows accelerated sequence  
104 evolution relative to *Xenoturbella*<sup>3</sup> – and from two closely related species  
105 *Praesagittifera naikaiensis*<sup>17</sup> and *Symsagittifera roscoffensis*<sup>18</sup>. The analyses of gene  
106 content of *Hofstenia* showed similar numbers of genes and gene families to other  
107 bilaterians<sup>16</sup>, while an analysis of the neuropeptide content concluded that most  
108 bilaterian neuropeptides were present in Xenacoelomorpha<sup>19</sup>.

109 In order to infer the characteristics of the ancestral xenacoelomorph genome,  
110 and to complement the data from the Acoelomorpha, we describe a highly-scaffolded  
111 genome of the slowly evolving xenacoelomorph *Xenoturbella bocki*. This allows us to

112 contribute knowledge of Xenacoelomorpha and *Xenoturbella* in particular of genomic  
113 traits, such as gene content and genome-structure and to help reconstruct the genome  
114 structure and composition of the ancestral xenacoelomorph.

115

## 116 **Results**

### 117 **Assembly of a draft genome of *Xenoturbella bocki*.**

118 We collected *Xenoturbella bocki* specimens (Fig. 1) from the bottom of the  
119 Gullmarsfjord close to the biological field station in Kristineberg (Sweden). These adult  
120 specimens were starved for several days in tubes with artificial sea water, and then  
121 sacrificed in lysis buffer. We extracted high molecular weight (HMW) DNA from single  
122 individuals for each of the different sequencing steps below.

123 We assembled a high-quality draft genome of *Xenoturbella bocki* using one short  
124 read Illumina library and one TruSeq Synthetic Long Reads (TSLR) Illumina library.  
125 We used a workflow based on a primary assembly with SPAdes (Methods; <sup>20</sup>). The  
126 primary assembly had an N50 of 8.5kb over 37,880 contigs with a maximum length of  
127 206,709bp. After using the redundans pipeline<sup>21</sup> this increased to an N50 of ~62kb  
128 over 23,094 contigs and scaffolds spanning ~121Mb, and a longest scaffold of  
129 960,978kb (supplementary Table 1).

130 The final genome was obtained with Hi-C scaffolding using the program  
131 instaGRAAL (Methods, see supplementary for contact map;<sup>22</sup>). The scaffolded  
132 genome has a span of 111 Mbp (117 Mbp including small fragments unincorporated  
133 into the HiC assembly) and an N50 of 2.7 Mbp (for contigs >500bp). The assembly  
134 contains 18 megabase-scale scaffolds encompassing 72 Mbp (62%) of the genomic  
135 sequence, with 43% GC content. The original assembly indicated a repeat content of  
136 about 25% after a RepeatModeller based RepeatMasker annotation (Methods). As  
137 often seen in non-model organisms, about 2/3 of the repeats are not classified.

138 We used BRAKER1<sup>23,24</sup> with extensive RNA-Seq data, and additional single-cell  
139 UTR enriched transcriptome sequencing data to predict 15,154 gene models. 9,575  
140 gene models (63%) are found on the 18 large scaffolds (which represent 62% of the  
141 total sequence). 13,298 of our predicted genes (88%) have RNA-Seq support.  
142 Although this proportion is at the low end of bilaterian gene counts, we note that our  
143 RNA-seq libraries were all taken from adult animals and thus may not represent the  
144 true complexity of the gene complement. We consider our predicted gene number to

145 be a lower bound estimate for the true gene content.

146 The predicted *X. bocki* genes have a median coding length of 873 nt and a mean  
147 length of 1330 nt. Median exon length is 132 nt (mean 212 nt) and median intron length  
148 is 131 nt (mean 394 nt). Genes have a median of 4 exons and a mean of 8.5 exons.  
149 2,532 genes have a single exon and, of these, 1,381 are supported as having a single  
150 exon by RNA-Seq (TPM>1). A comparison of the exon, intron, and intergenic  
151 sequence content in *Xenoturbella* with those described in other animal genomes<sup>25</sup>  
152 show that *X. bocki* falls within the range of other similarly sized metazoan genomes  
153 (Fig. 1b) for all these measures.

154

### 155 The genome of a co-sequenced *Chlamydia* species

156 We recovered the genome of a marine *Chlamydia* species from Illumina data obtained  
157 from one *X. bocki* specimen and from Oxford Nanopore data from a second specimen  
158 supporting previous microscopic analyses and single gene PCRs suggesting that *X.*  
159 *bocki* is host to a species in the bacterial genus *Chlamydia*. The bacterial genome was  
160 found as 5 contigs spanning 1,906,303 bp (N50 of 1,237,287 bp) which were  
161 assembled into 2 large scaffolds. Using PROKKA<sup>26</sup>, we predicted 1,738 genes in this  
162 bacterial genome, with 3 ribosomal RNAs, 35 transfer RNAs, and 1 transfer-  
163 messenger RNA. The genome is 97.5% complete for bacterial BUSCO<sup>27</sup> genes,  
164 missing only one of the 40 core genes.

165 Marine chlamydiae are not closely related to the group of human pathogens<sup>28</sup>  
166 and we were not able to align the genome of the *Chlamydia*-related symbiote from *X.*  
167 *bocki* to the reference strain *Chlamydia trachomatis* F/SW4, nor to *Chlamydophila*  
168 *pneumoniae* TW-183. To investigate the phylogenetic position of the species co-  
169 occurring with *Xenoturbella*, we aligned the 16S rRNA gene from the *X. bocki*-hosted  
170 *Chlamydia* with orthologs from related species including sequences of genes amplified  
171 from DNA/RNA extracted from deep sea sediments. The *X. bocki*-hosted *Chlamydia*  
172 belong to a group designated as Simkaniaceae in<sup>28</sup>, with the sister taxon in our  
173 phylogenetic tree being the *Chlamydia* species previously found in *X. westbladi* (*X.*  
174 *westbladi* is almost certainly a synonym of *X. bocki*)<sup>7</sup> (Fig. 2a).

175 To investigate whether the *X. bocki*-hosted *Chlamydia* might contribute to the  
176 metabolic pathways of its host, we compared the completeness of metabolic pathways  
177 in KEGG for the *X. bocki* genome alone and for the *X. bocki* genome in combination  
178 with the bacteria. We found only slightly higher completeness in a small number of

179 pathways involved in carbohydrate metabolism, carbon fixation, and amino acid  
180 metabolism (see supplementary material) suggesting that the relationship is likely to  
181 be commensal or parasitic rather than a true symbiosis.

182 A second large fraction of bacterial reads, annotated as Gammaproteobacteria,  
183 were identified and filtered out during the data processing steps. These bacteria were  
184 also previously reported as potential symbionts of *X. bocki*<sup>29</sup>. However, these  
185 sequences were not sufficiently well covered to reconstruct a genome and we did not  
186 investigate them further.

187

### 188 **A phylogenetic gene presence/absence matrix supports Xenambulacraria**

189 The general completeness of the *X. bocki* gene set allowed us to use the presence  
190 and absence of genes identified in our genomes as a source of information to find the  
191 best supported phylogenetic position of the Xenacoelomorpha. We conducted two  
192 separate phylogenetic analyses of gene presence/absence data: one including the  
193 fast-evolving Acoelomorpha and one without. In both analyses the best tree grouped  
194 *Xenoturbella* with the Ambulacraria (Fig. 2b). The analysis including acoels, however,  
195 placed the acoels as the sister-group to Nephrozoa separate from *Xenoturbella* (Fig.  
196 2c). Because other data have shown the monophyly of Xenacoelomorpha to be robust,  
197 we interpret this result as being the result of systematic error caused by a high rate of  
198 gene loss or by orthologs being incorrectly scored as missing due to higher rates of  
199 sequence evolution in acoelomorphs<sup>30</sup>.

200

### 201 **The *X. bocki* molecular toolkit is typical of bilaterians.**

202 One of our principal aims was to ask whether the *Xenoturbella* genome lacks  
203 characteristics otherwise present in the Bilateria. We found that for the Metazoa gene  
204 set in BUSCO (v5) the *X. bocki* proteome translated from our gene predictions is  
205 82.5% complete and ~90% complete when partial hits are included (82% and 93%  
206 respectively for the Eukaryote gene set). This estimate is even higher in the acoel  
207 *Hofstenia miamia*, which was originally reported to be 90%<sup>16</sup>, but in our re-analysis  
208 was 95.71%. In comparison, the morphologically highly simplified and fast evolving  
209 annelid *Intoshia line*<sup>31</sup> has a genome of fewer than 10,000 genes<sup>32</sup> and in our analysis  
210 is only ~64% complete for the BUSCO (v5) Metazoa set. The model nematode  
211 *Caenorhabditis elegans* is ~79% complete for the same set. Despite the morphological  
212 simplicity of both *Xenoturbella*, and *Hofstenia*, these Xenacoelomorpha are missing

2a

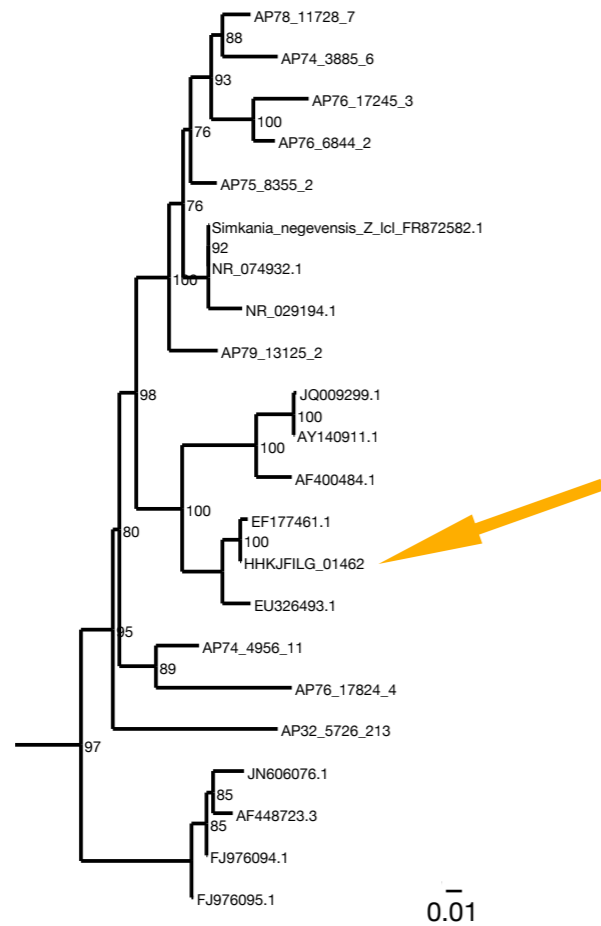

Figure 2a: *Xenoturbella bocki* harbours a marine Chlamydiae species as potential symbiont. In the phylogenetic analysis of 16S rDNA (ML: GTR+F+R7; bootstrap values included) the bacteria in our *X. bocki* isolate (arrow) are sister to a previous isolate from *X. westbaldi*. *X. westbaldi* is most likely a mis-identification of *X. bocki*. (b/c) A phylogeny based on presence and absence of genes calculated with OMA. Both analysis (b) and (c) confirm Xenambulacraria, i.e. Xenoturbellida in a group with Echinoderms and Hemichordates. Inclusion of the acoel flat worms places these as sister to all other Bilateria (b). This placement appears an artefact due to the very fast evolution in this taxon, in particular as good evidence exists for uniting Xenoturbellida and Acoela refs 5 and 6.

2b

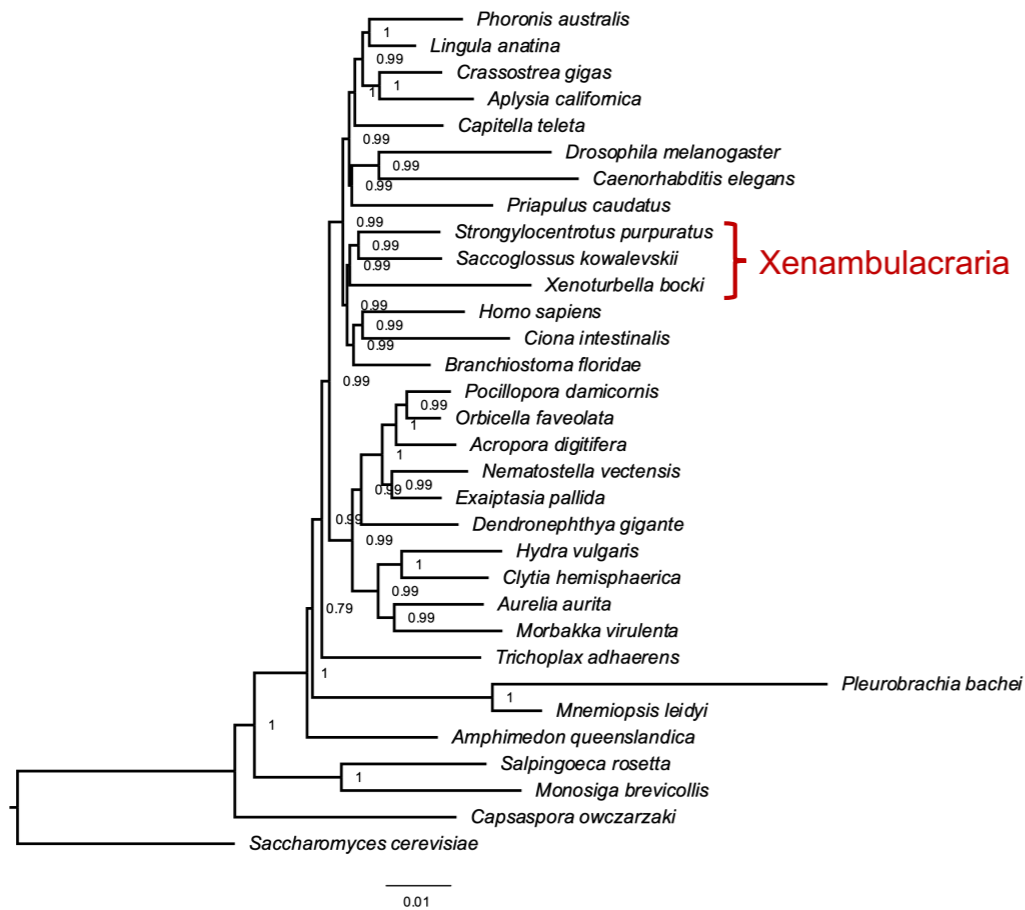

2c

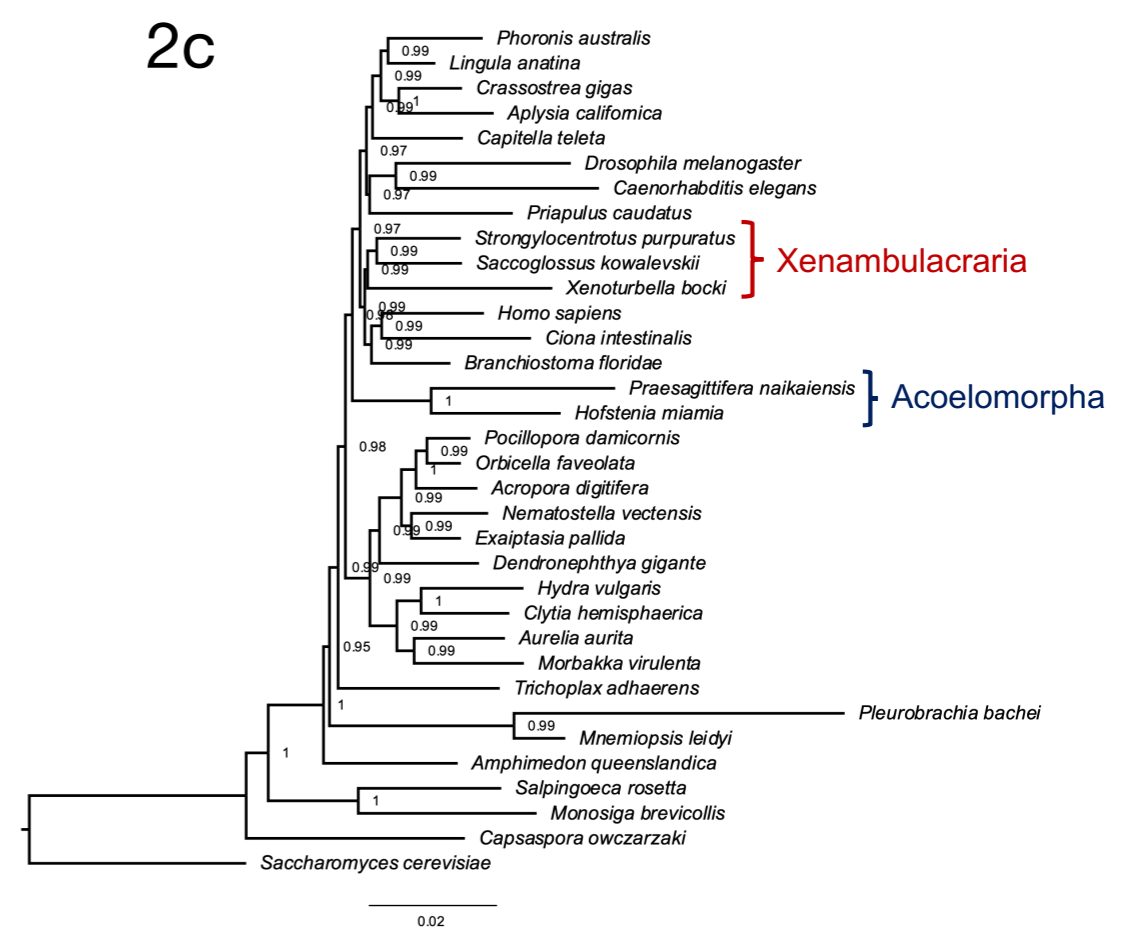



213 few core genes compared to other bilaterian lineages that we perceive to have  
214 undergone a high degree of morphological evolutionary change (such as the evolution  
215 of miniaturisation, parasitism, sessility etc).

216 Using our phylogenomic matrix of gene presence/absence (see above) we identified  
217 all orthologs that could be detected both in Bilateria (in any bilaterian lineage) and in  
218 any non-bilaterian; ignoring horizontal gene transfer and other rare events, these  
219 genes must have existed in Urbilateria (and, of less interest to us, in Urmetazoa). The  
220 absence of any of these bilaterian genes in any lineage of Bilateria must therefore be  
221 explained by loss of the gene. All individual bilaterian genomes were missing many  
222 of these orthologs but Xenacoelomorphs and some other bilaterians lacked more of  
223 these than did other taxa. The average numbers of these genes present in bilaterians  
224 = 7577; *Xenoturbella* = 5459; *Hofstenia* = 5438; *Praesagittifera* = 4280; *Drosophila* =  
225 4844; *Caenorhabditis* = 4323.

226 To better profile the *Xenoturbella* and xenacoelomorph molecular toolkit, we  
227 used OrthoFinder to conduct orthology searches in a comparison of 155 metazoan  
228 and outgroup species, including the transcriptomes of the sister species *X. profunda*  
229 and an early draft genome of the acoel *Paratomella rubra* we had available, as well as  
230 the *Hofstenia* and *Praesagittifera* proteomes (Supplementary online material). For  
231 each species we counted, in each of the three Xenacoelomorphs, the number of  
232 orthogroups for which a gene was present. The proportion of orthogroups containing  
233 an *X. bocki* and *X. profunda* protein (87.4% and 89.2%) are broadly similar to the  
234 proportions seen in other well characterised genomes, for example *S. purpuratus*  
235 proteins (93.8%) or *N. vectensis* proteins (84.3%) (Fig 3a). In this analysis, the fast-  
236 evolving nematode *Caenorhabditis elegans* appears as an outlier, with only ~64% of  
237 its proteins in orthogroups and ~35% unassigned. Both *Xenoturbella* species have an  
238 intermediate number of unassigned genes of ~11-12%. Similarly, the proportion of  
239 species-specific genes (~14% of all genes) corresponds closely to what is seen in  
240 most other species (with the exception of the parasitic annelid *I. linei*, Fig. 3a).

241

#### 242 Idiosyncrasies of *Xenoturbella*

243 In order to identify sets of orthologs specific to the two *Xenoturbella* species we used  
244 the kinfin software<sup>33</sup> and found 867 such groups in the OrthoFinder clustering. We  
245 profiled these genes based on Pfam domains and GO terms derived from  
246 InterProScan. While these *Xenoturbella* specific proteins fall into diverse classes, we

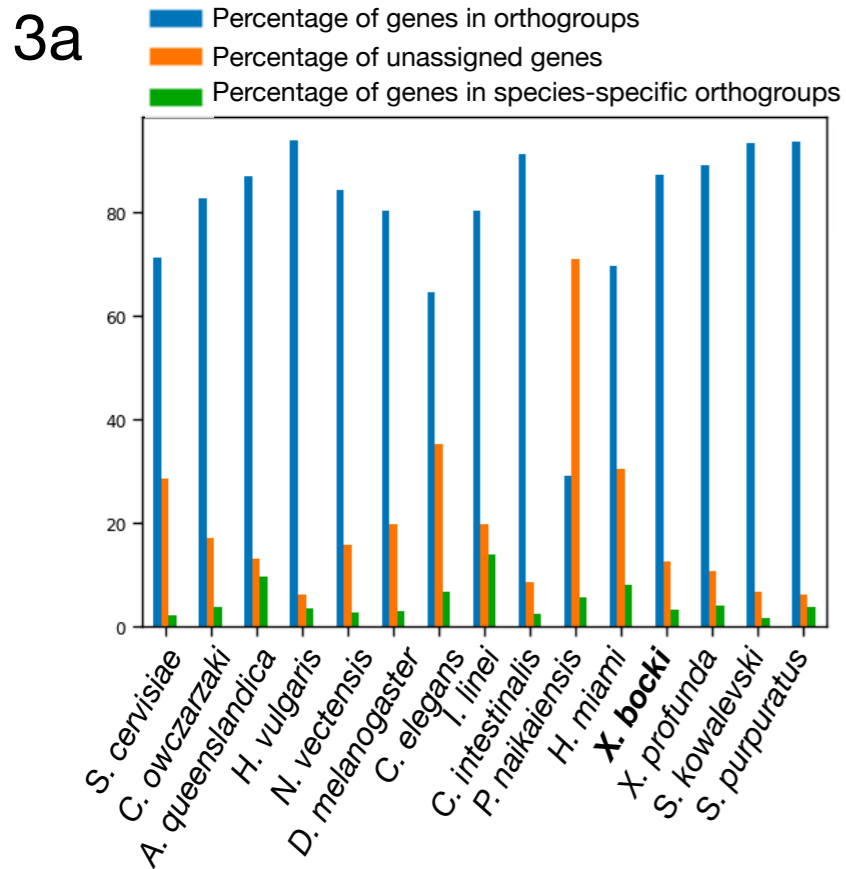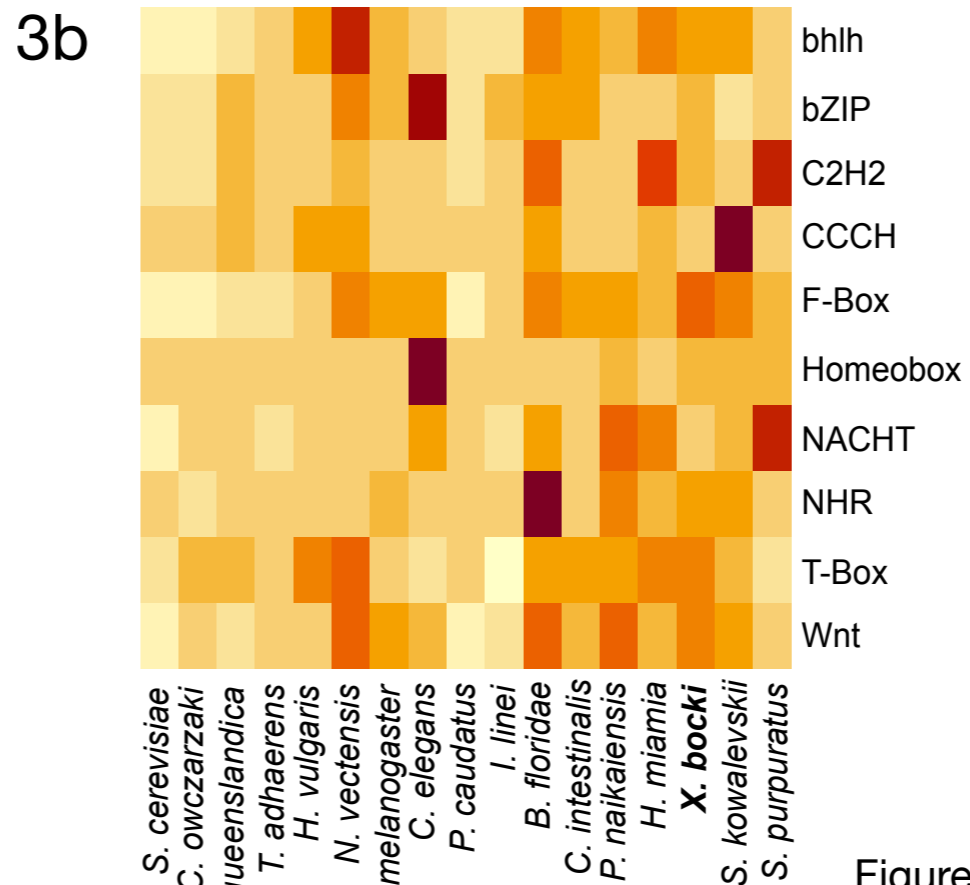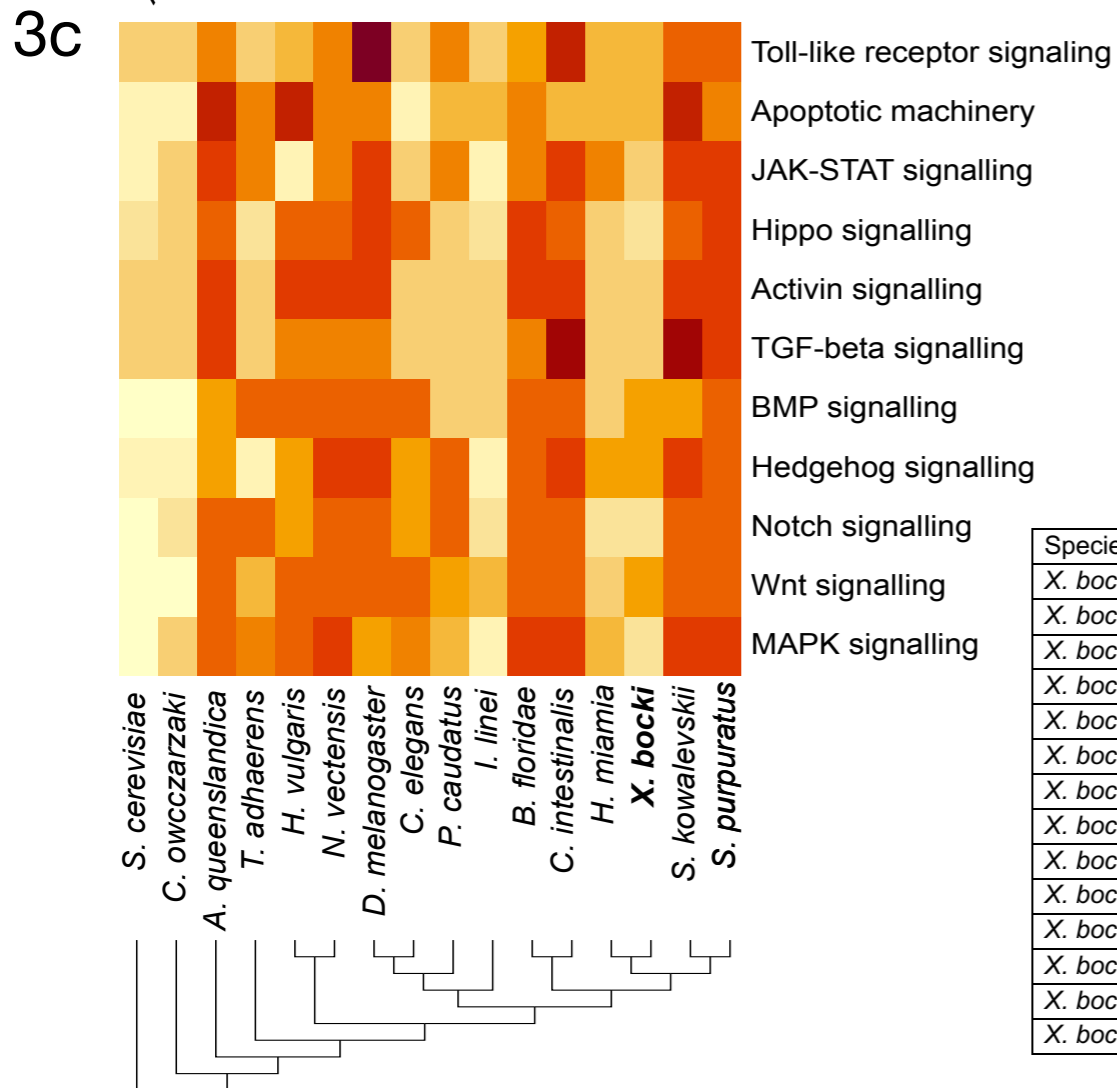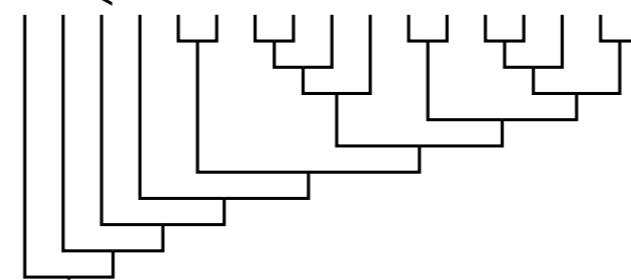

**t-test**

| Species 1       | Species 2               | p-value          |
|-----------------|-------------------------|------------------|
| <i>X. bocki</i> | <i>H. miamia</i>        | 0.9448           |
| <i>X. bocki</i> | <i>S. kowalevskii</i>   | <b>0.0001974</b> |
| <i>X. bocki</i> | <i>S. purpuratus</i>    | <b>0.0004118</b> |
| <i>X. bocki</i> | <i>C. intestinalis</i>  | <b>0.0003404</b> |
| <i>X. bocki</i> | <i>B. floridae</i>      | <b>0.004928</b>  |
| <i>X. bocki</i> | <i>C. elegans</i>       | 0.3893           |
| <i>X. bocki</i> | <i>D. melanogaster</i>  | <b>0.0004194</b> |
| <i>X. bocki</i> | <i>I. linei</i>         | 0.2469           |
| <i>X. bocki</i> | <i>N. vectensis</i>     | <b>0.00277</b>   |
| <i>X. bocki</i> | <i>H. vulgaris</i>      | 0.06593          |
| <i>X. bocki</i> | <i>T. adhaerens</i>     | 0.4552           |
| <i>X. bocki</i> | <i>A. queenslandica</i> | <b>0.001896</b>  |
| <i>X. bocki</i> | <i>C. owczarzaki</i>    | 0.1184           |
| <i>X. bocki</i> | <i>S. cerevisiae</i>    | <b>0.007309</b>  |

Figure 3: (a) In our orthology screen *X. bocki* shows similar percentages of genes in orthogroups, unassigned genes, and species-specific orthogroups as other well-annotated genomes. (b) The number of family members per species in major gene families (based on Pfam domains), like transcription factors, fluctuates in evolution. The *X. bocki* genome does not appear to contain particularly less or more genes in any of the analysed families. (c) Cell signalling pathways in *X. bocki* are functionally complete, but in comparison to other species contain less genes. The overall completeness is not significantly different to, for example, the nematode *C. elegans* (inset, t-test). Schematic cladograms in b/c drawn by the authors.

247 did see a considerable number of C-type lectin, Immunoglobulin-like, PAN, and Kringle  
248 domain containing Pfam annotations. Along with the Cysteine-rich secretory protein  
249 family and the G-protein coupled receptor activity GO terms, these genes and families  
250 of genes may be interesting for future studies into the biology of *Xenoturbella* in its  
251 native environment.

252

### 253 Gene families and signaling pathways are retained in *X. bocki*

254 In our orthology clustering we did not see an inflation of *Xenoturbella*-specific groups  
255 in comparison to other taxa, but also no conspicuous absence of major gene families  
256 (Fig. 3b). Family numbers of transcription factors like Zinc-fingers or homeobox-  
257 containing genes, as well as, for example, NACHT-domain encoding genes seem to  
258 be neither drastically inflated nor contracted in comparison to other species in our  
259 InterProScan based analysis.

260 To catalogue the completeness of cell signalling pathways we screened the *X.*  
261 *bocki* proteome against KEGG pathway maps using GenomeMaple<sup>34</sup>. The *X. bocki*  
262 gene set is largely complete in regard to the core proteins of these pathways, while an  
263 array of effector proteins is absent (Fig. 3c). In comparison to other metazoan species,  
264 as well as a unicellular choanoflagellate and a yeast, the *X. bocki* molecular toolkit has  
265 significantly lower KEGG completeness than morphologically complex animals such  
266 as the sea urchin and amphioxus (t-test; Fig. 3c). *Xenoturbella* is, however, not  
267 significantly less complete when compared to other bilaterians considered to have low  
268 morphological complexity and which have been shown to have reduced gene content,  
269 such as *C. elegans*, the annelid parasite *Intoshia linei*, or the acoel *Hofstenia miamia*  
270 (Fig. 3c).

### 271 Clustered homeobox genes in the *X. bocki* genome

272 Acoelomorph flatworms possess three unlinked HOX genes, orthologs of anterior  
273 (Hox1), central (Hox4/5 or Hox5) and posterior Hox (HoxP). In contrast, previous  
274 analysis of *X. bocki* transcriptomes identified one anterior, three central and one  
275 posterior Hox genes. We identified clear evidence of a syntenic Hox cluster with four  
276 Hox genes (centHox1, postHox, centHox3, and antHox1) in the *X. bocki* genome (Fig.  
277 4). There was also evidence of a fragmented annotation of centHox2, split between  
278 the 4 gene Hox cluster and a separate scaffold (Fig. 4). In summary, this suggests that  
279 all five Hox genes form a Hox cluster in the *X. bocki* genome, but that there are

4a

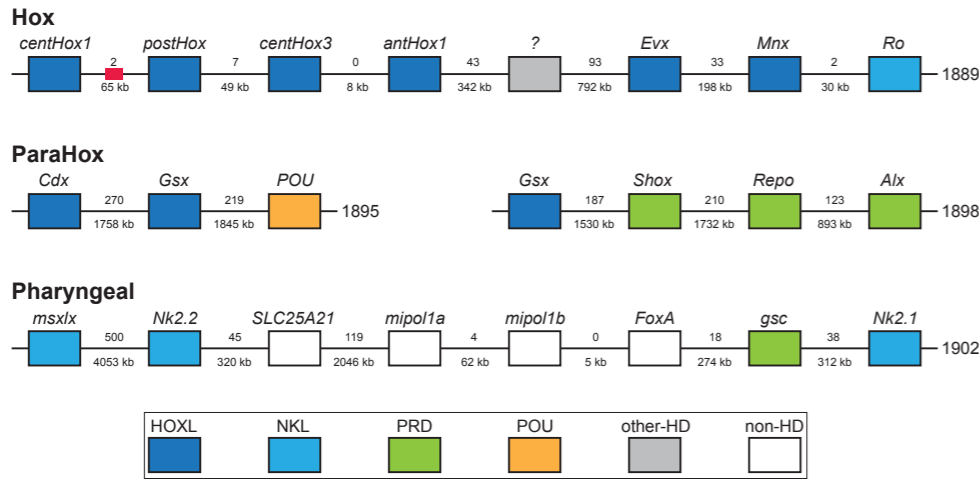

4c

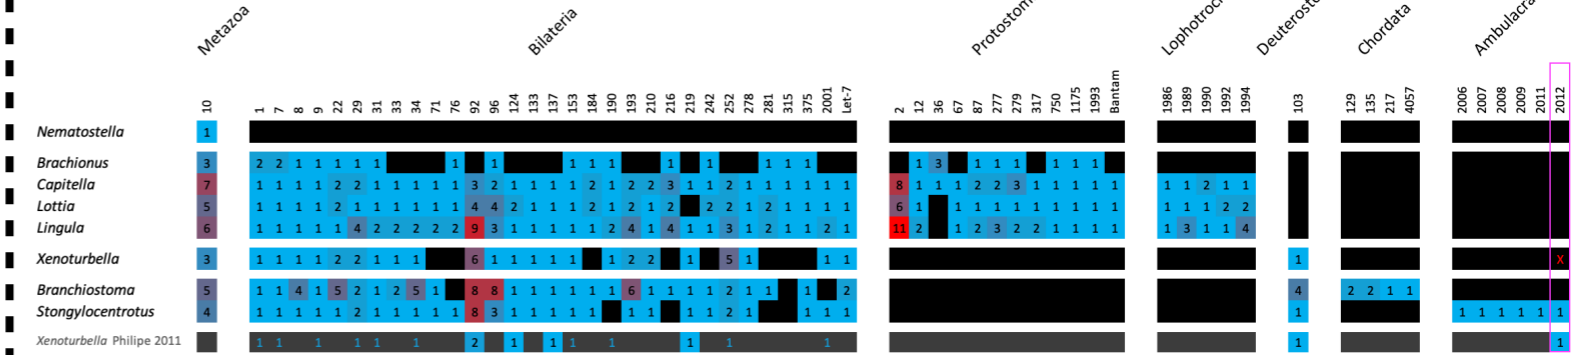

4b

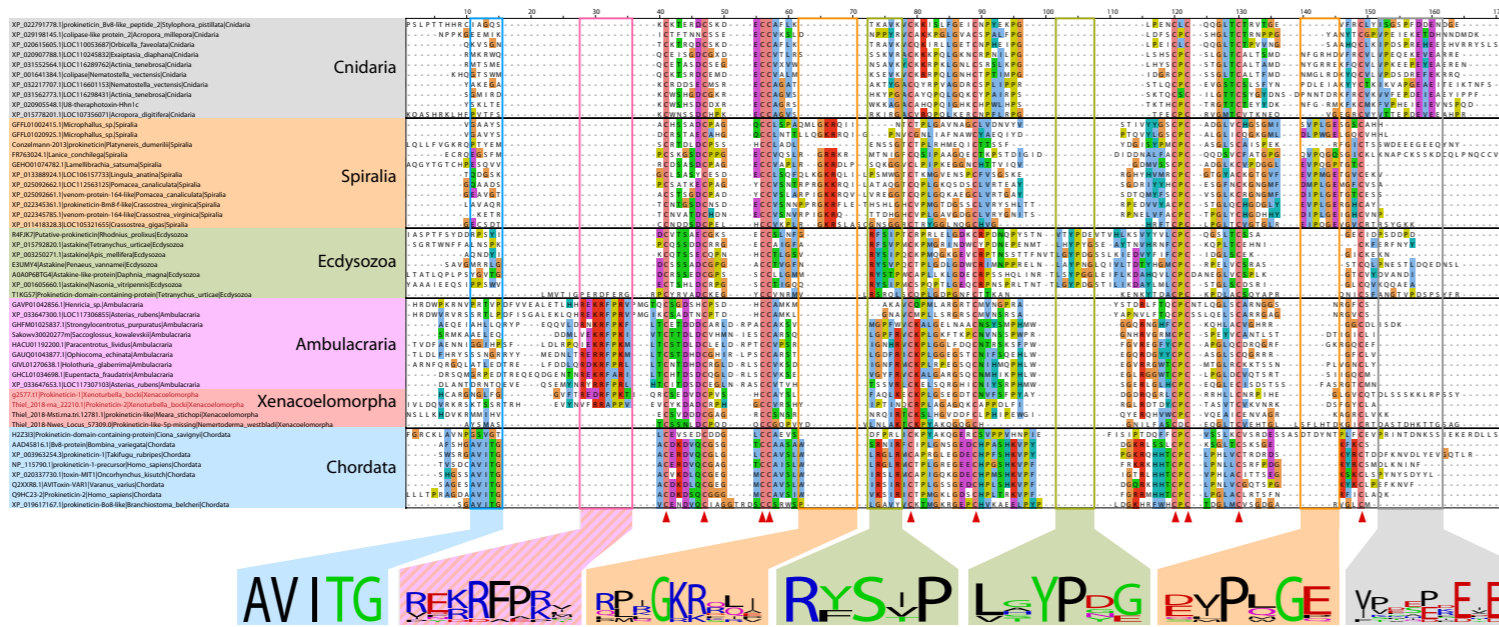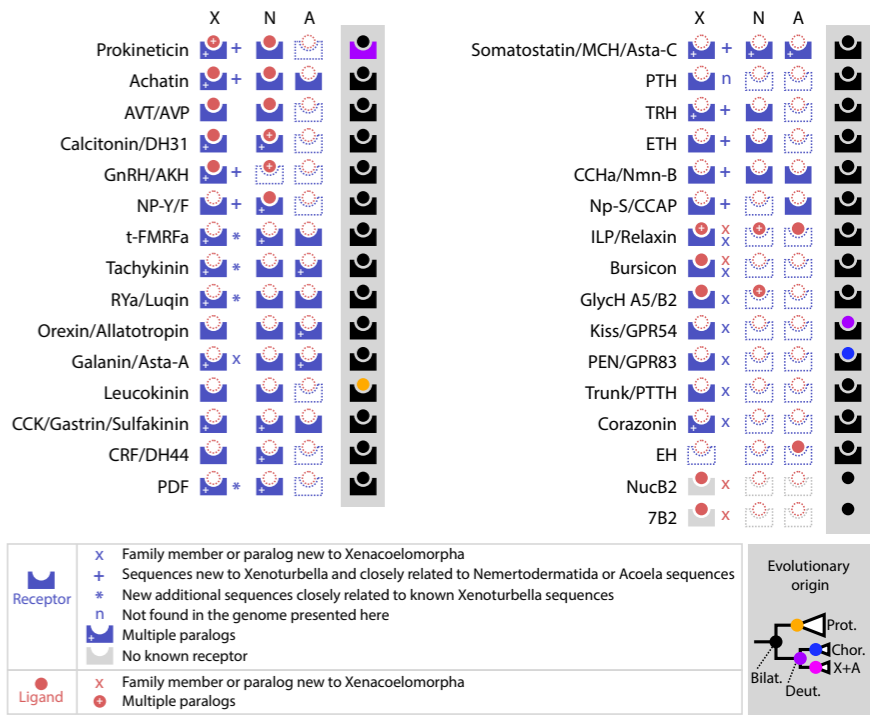

Figure 4: (a) *X. bocki* has 5 HOX genes, which are located in relatively close proximity on one of our chromosome size scaffolds. Similar clusters exist for the ParaHox and “pharyngeal” genes. Numbers between genes are distance (below) and number of genes between (below). Colours indicate gene families. Red box marks the position of a partial Hox gene. The “?” gene has an unresolved homeodomain identity. (b) We found a specific prokineticin ligand signature sequence in *X. bocki*, which was previously reported for Ecdysozoa and Chordata, as well as a “K/R-RFP-K/R”, sequence shared only by ambulacrarians and *X. bocki*. Signature previously reported for Ecdysozoa and Chordata, as well as new signatures we found in Spiralia and Cnidaria is absent from ambulacrarian and *X. bocki* prokineticin ligand sequences. The inset cladogram depicts the evolutionary origin of sequences in accordance with our analysis: **Bilaterian**, **Protostomia**, **Chordate**, **Xenacoelomorpha** + **Ambulacraria** last common ancestor respectively. (c) The revised microRNA complement of *X. bocki* has a near complete set of metazoan, bilaterian and deuterostome families and genes. Presence (color) and absence (black) of microRNA families (column), paralogue numbers (values & heatmap coloring) organized in node-specific blocks in a range of representative protostome and deuterostome species compared with *Xenoturbella* (species from MirGeneDB 2.1 - Fromm et al 2021). The bottom row depicts 2011 complement by Philippe et al 2011 (blue numbers on black depict detected miRNA reads, but lack of genomic evidence). Red “x” in pink box highlights the lack of evidence for an ambulacraria-specific microRNA in *X. bocki*.

280 possible unresolved assembly errors disrupting the current annotation. We also  
281 identified other homeobox genes on the Hox cluster scaffold, including *Evx* (Fig. 4a).

282 Along with the Hox genes, we surveyed other homeobox genes that are  
283 typically clustered in Bilateria. The canonical bilaterian paraHox cluster contains three  
284 genes *Cdx*, *Xlox* (=Pdx) and *Gsx*. We identified *Cdx* and a new *Gsx* annotation on the  
285 same scaffold, as well as a previously reported *Gsx* paralog on a separate scaffold.  
286 This indicates partial retention of the paraHox cluster in *X. bocki* along with a  
287 duplication of *Gsx*. On both of these paraHox containing scaffolds we observed other  
288 homeobox genes.

289 Hemichordates and chordates have a conserved cluster of genes involved in  
290 patterning their pharyngeal pores - the so-called 'pharyngeal cluster'. The homeobox  
291 genes of this cluster (*Msx1x*, *Nk2-1/2/4/8*) were present on a single *X. bocki* scaffold.  
292 Another pharyngeal cluster transcription factor, the Forkhead containing *Foxa*, and  
293 'bystander' genes from that cluster including *Egln*, *Mipol1* and *Slc25a21* are found in  
294 the same genomic region. Different sub-parts of the cluster are found in non-bilaterians  
295 and protostomes and the cluster may well be plesiomorphic for the Bilateria rather  
296 than a deuterostome synapomorphy<sup>35</sup>.

297

298 The *X. bocki* neuropeptide complement is larger than previously thought

299 A catalogue of acoelomorph neuropeptides was previously described using  
300 transcriptome data<sup>36</sup>. We have discovered 12 additional neuropeptide genes and 39  
301 new neuropeptide receptors in *X. bocki* adding 6 bilaterian peptidergic systems to the  
302 *Xenoturbella* catalogue (*NPY-F* ; *MCH/Asta-C* ; *TRH* ; *ETH* ; *CCHa/Nmn-B* ; *Np-*  
303 *S/CCAP*), and 6 additional bilaterian systems to the Xenacoelomorpha catalogue  
304 (*Corazonin* ; *Kiss/GPR54* ; *GPR83* ; *7B2* ; *Trunk/PTTH* ; *NUCB2*) making a total of 31  
305 peptidergic systems (Fig. 4, Supplementary).

306 Among the ligand genes, we identified 6 new repeat-containing sequences. One  
307 of these, the LRIGamide-peptide, had been identified in Nemertodermatida and  
308 Acoela and its loss in *Xenoturbella* had been proposed<sup>36</sup>. We also identified the first  
309 *7B2* neuropeptide and *NucB2/Nesfatin* genes in Xenacoelomorpha. Finally, we  
310 identified 3 new *X. bocki* insulin-like peptides, one of them sharing sequence similarity  
311 and an atypical cysteine pattern with the Ambulacrarian octinsulin, constituting a  
312 potential synapomorphy of Xenambulacraria (see Supplementary).

313 Our searches also revealed the presence of components of the arthropod

314 moulting pathway components (PTTH/trunk, NP-S/CCAP and Bursicon receptors),  
315 which have recently been shown to be of ancient origin (de Oliveira et al., 2019). We  
316 further identified multiple paralogs for, e.g the Tachykinin, Rya/Luquin, tFMRFa,  
317 Corazonin, Achatin, CCK, and Prokineticin receptor families. Two complete *X. bocki*  
318 Prokineticin ligands were also found in our survey (see Supplementary).

319 Chordate Prokineticin ligands possess a conserved N-terminal “AVIT” sequence  
320 required for the receptor activation<sup>37</sup>. This sequence is absent in arthropod Astakine,  
321 which instead possess two signature sequences within their Prokineticin domain<sup>38</sup>.  
322 To investigate Prokineticin ligands in Xenacoelomorpha we compared the sequences  
323 of their prokineticin ligands with those of other bilaterians (Fig. 4b, Supplementary).  
324 Our alignment reveals clade specific signatures already reported in Ecdysozoa and  
325 Chordata sequences, but also two new signatures specific to Lophotrochozoa and  
326 Cnidaria sequences, as well as a very specific “K/R-RFP-K/R” signature shared only  
327 by ambulacrarian and *Xenoturbella bocki* sequences. The shared  
328 Ambulacrarian/Xenacoelomorpha signature is found at the same position as the  
329 Chordate sequence involved in receptor activation - adjacent to the N-terminus of the  
330 Prokineticin domain (Fig. 4b).

331  
332 **The *X. bocki* genome contains most bilaterian miRNAs reported missing from**  
333 **acoels.**

334 microRNAs have previously been used to investigate the phylogenetic position of the  
335 acoels and *Xenoturbella*. The acoel *Symsagittifera roscoffensis* lacks protostome and  
336 bilaterian miRNAs and this lack was interpreted as supporting the position of acoels  
337 as sister-group to the Nephrozoa. Based on shallow 454 microRNA sequencing (and  
338 sparse genomic traces) of *Xenoturbella*, some of the bilaterian miRNAs missing from  
339 acoels were found - 16 of the 32 expected metazoan (1 miRNA) and bilaterian (31  
340 miRNAs) microRNA families – of which 6 could be identified in genome traces<sup>9</sup>.

341 By deep sequencing two independent small RNA samples, we have now  
342 identified the majority of the missing metazoan and bilaterian microRNAs and  
343 identified them in the genome assembly (Fig. 4c). Altogether, we found 23 out of 31  
344 bilaterian microRNA families (35 genes including duplicates); the single known  
345 Metazoan microRNA family (MIR-10) in 2 copies; the Deuterostome-specific MIR-103;  
346 and 7 *Xenoturbella*-specific microRNAs giving a total of 46 microRNA genes. None of  
347 the protostome-specific miRNAs were found. We could not confirm in the RNA

348 sequences or new assembly a previously identified, and supposedly  
349 xenambulacrarian-specific MIR-2012 ortholog.

350

### 351 **The *X. bocki* genome retains ancestral metazoan linkage groups.**

352 The availability of chromosome-scale genomes has made it possible to reconstruct 24  
353 ancestral linkage units broadly preserved in bilaterians<sup>39</sup>. In fast-evolving genomes,  
354 such as those of nematodes, tunicates or platyhelminths, these ancestral linkage  
355 groups (ALGs) are often dispersed and/or extensively fused (Supplementary). We  
356 were interested to test if the general conservation of the gene content in *X. bocki* is  
357 reflected in its genome structure.

358 We compared the genome of *Xenoturbella* to several other metazoan genomes  
359 and found that it has retained most of these ancestral bilaterian units: 12  
360 chromosomes in the *X. bocki* genome derive from a single ALG, five chromosomes  
361 are made of the fusion of two ALGs, and one *Xenoturbella* chromosome is a fusion of  
362 three ALGs, as highlighted with the comparison of ortholog content with amphioxus,  
363 the sea urchin and the sea scallop (Fig. 5 and Supplementary).

364 One ancestral linkage group that has been lost in chordates but not in  
365 ambulacrarians nor in molluscs (ALG R in sea urchin and sea scallop) is detectable in  
366 *X. bocki* (Fig. 5), while *X. bocki* does not show the fusions that are characteristic of  
367 lophotrochozoans.

368 We also attempted to detect some pre-bilaterian arrangement of ancestral  
369 linkage: for instance, ref <sup>40</sup> predicted that several pre-bilaterian linkage groups  
370 successively fused in the bilaterian lineage to give ALGs A1, Q and E. These ALGs  
371 are all represented as single units in *X. bocki* in common with other Bilateria. None of  
372 the inferred pre-bilaterian chromosomal arrangements that could have provided  
373 support for the Nephrozoa hypothesis were found *in X. bocki* although of course this  
374 does not rule out Nephrozoa.

375

### 376 One *X. bocki* chromosomal fragment appears aberrant

377 The smallest of the 18 large scaffolds in the *X. bocki* genome did not show strong 1:1  
378 clustering with any scaffold/chromosome of the bilaterian species we compared it to.  
379 To exclude potential contamination in the assembly as a source for this contig we  
380 examined the orthogroups to which the genes from this scaffold belong. We found that  
381 *Xenoturbella profunda*<sup>41</sup>, for which a transcriptome is available, was the species that

5a

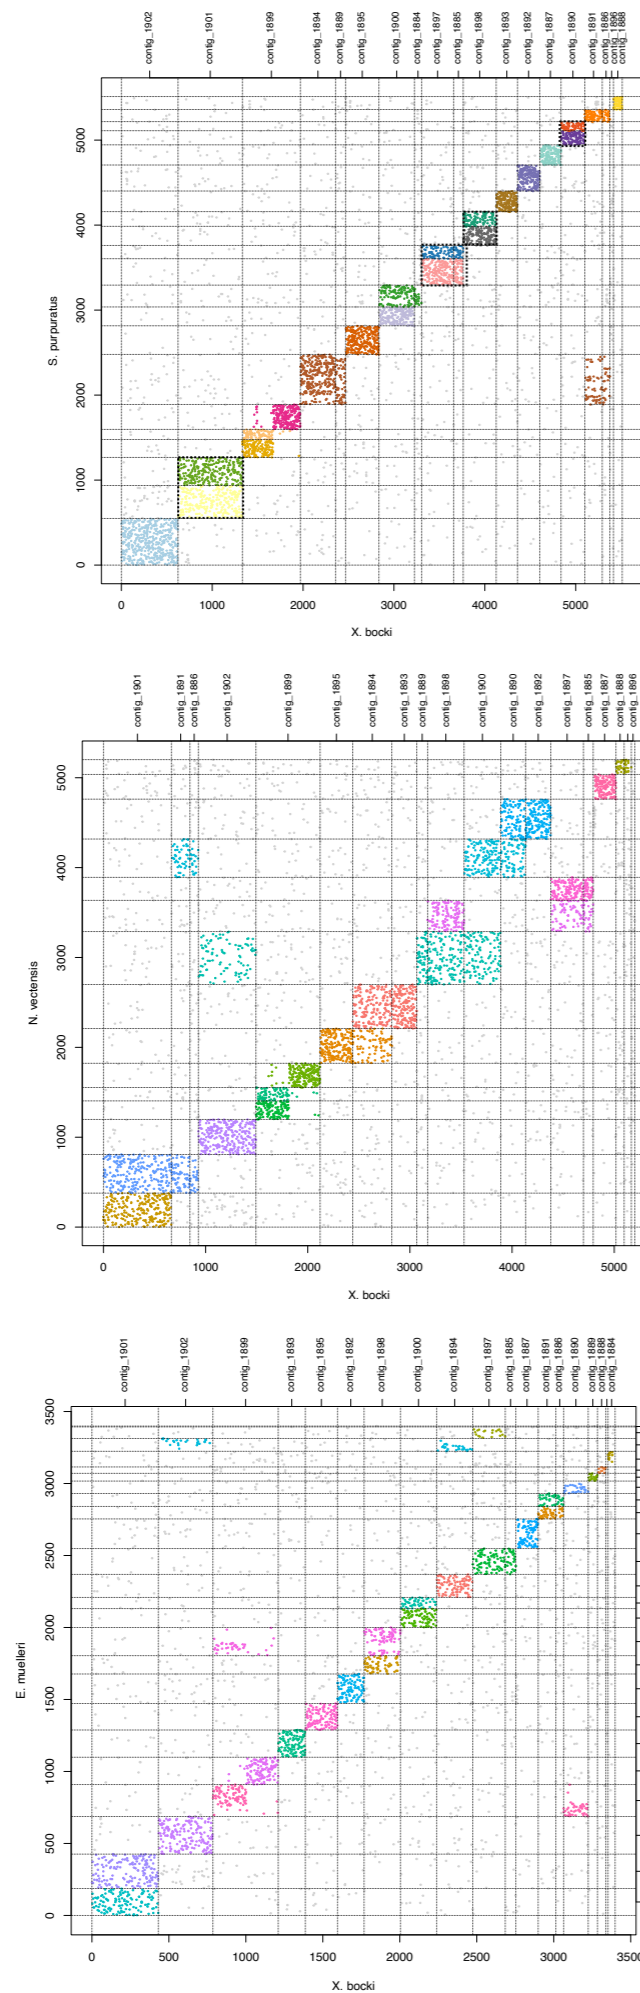

5b

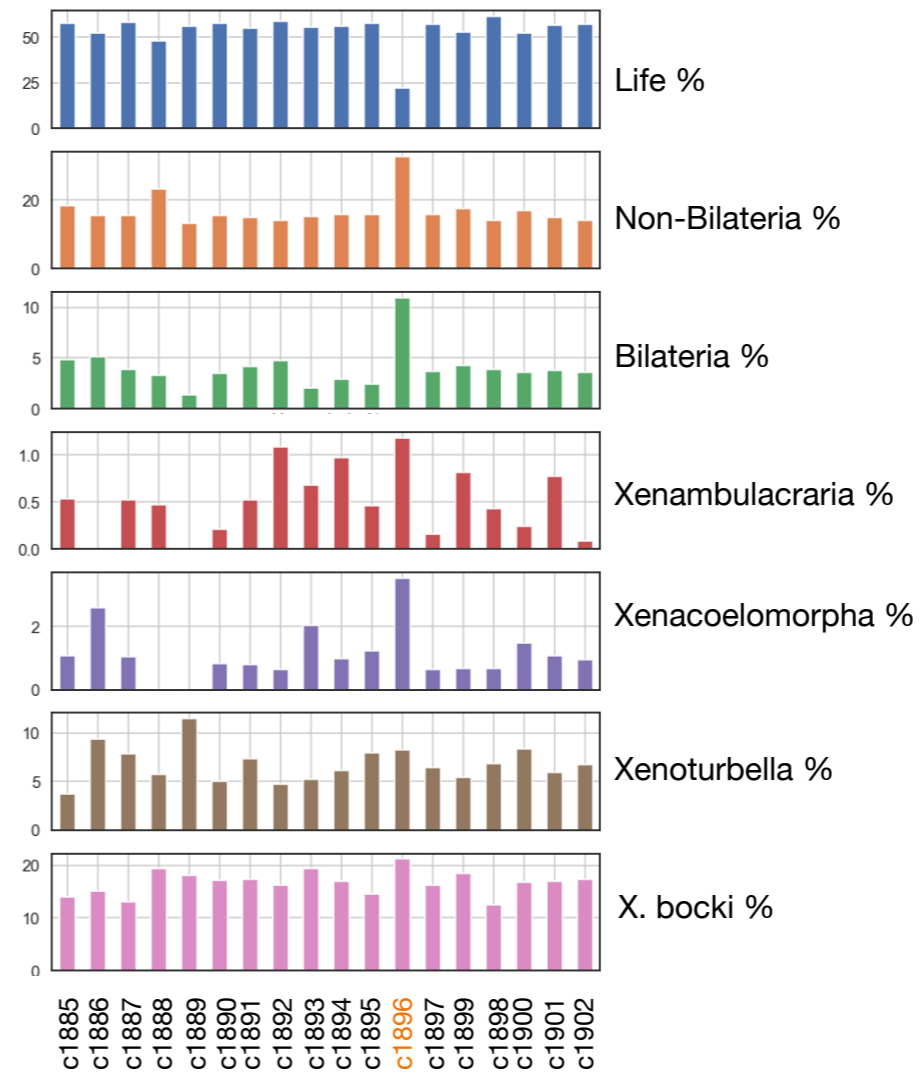

Figure 5: (a) A comparison of scaffolds in the *X. bocki* genome with other Metazoa. 17 of the 18 large scaffolds in the *X. bocki* genome are linked via synteny to distinct chromosomal scaffolds in these species. (b) Phylostratigraphic age distribution of genes on all major scaffolds in the *X. bocki* genome. One scaffold (c1896), which showed no synteny to a distinct chromosomal scaffold in the other metazoan species also had a divergent gene age structure in comparison to other *X. bocki* scaffolds.



382 most often occurred in the same orthogroup with genes from this scaffold (41 shared  
383 orthogroups), suggesting the scaffold is not a contaminant.

384 We did observe links between the aberrant scaffold and several scaffolds from  
385 the genome of the sponge *E. muelleri* in regard to synteny, but could not detect distinct  
386 synteny relationships to a single scaffold in another species. In line with this, genes  
387 on the scaffold show a different age structure compared to other scaffolds, with both  
388 more older genes (pre bilaterian) and more *Xenoturbella* specific genes (Fig. 5b;  
389 supported by Ks statistics, Supplementary). This aberrant scaffold also had  
390 significantly lower levels of methylation than the rest of the genome (Supplementary).

## 391 392 **DISCUSSION**

393 The phylogenetic positions of *Xenoturbella* and the Acoelomorpha have been  
394 controversial since the first molecular data from these species appeared over twenty  
395 five years ago. Today we understand that they constitute a monophyletic group of  
396 morphologically simple worms<sup>1,9,42</sup>, but there remains a disagreement over whether  
397 they represent a secondarily simplified sister group of the Ambulacraria or a primitively  
398 simple sister group to all other Bilateria.

399 Previous analyses of the content of genomes, especially of Acoela, have been  
400 used to bolster the latter view, with the small number of Hox genes and of microRNAs  
401 of acoels being interpreted as representing an intermediate stage on the path to the  
402 ~8 Hox genes and 30 odd microRNAs of the Nephrozoa. A strong version of the  
403 Nephrozoa idea would go further than these examples and anticipate, for example, a  
404 genome-wide paucity of bilaterian genes, GRNs and biochemical pathways and/or an  
405 arrangement of chromosomal segments intermediate between those of the  
406 Eumetazoa and the Nephrozoa.

407 One criticism of the results from analyses of acoel genomes is that the  
408 Acoelomorpha have evolved rapidly (their long branches in phylogenetic trees  
409 showing high rates of sequence change). This rapid evolution might plausibly be  
410 expected to correlate with other aspects of rapid genome evolution such as higher  
411 rates of gene loss and chromosomal rearrangements leading to significant differences  
412 from other Bilateria. The more normal rates of sequence evolution observed in  
413 *Xenoturbella* therefore recommend it as a more appropriate xenacoelomorph to study  
414 with fewer apomorphic characters expected.

415 We have sequenced, assembled, and analysed a draft genome of *Xenoturbella*

416 *bocki*. To help with annotation of the genome we have also sequenced miRNAs and  
417 small RNAs as well as using bisulphite sequencing, Hi-C and Oxford nanopore. We  
418 compared the gene content of the *Xenoturbella* genome to species across the  
419 Metazoa and its genome structure to several other high-quality draft animal genomes.

420 We found the *X. bocki* genome to be fairly compact, but not unusually reduced  
421 in size compared to many other bilaterians. It appears to contain a similar number of  
422 genes (~15,000) as other animals, for example from the model organisms *D.*  
423 *melanogaster* (>14,000) and *C. elegans* (~20,000). The BUSCO completeness, as  
424 well as a high level of representation of *X. bocki* proteins in the orthogroups of our 155  
425 species orthology screen indicates that we have annotated a near complete gene set.  
426 Surprisingly, there are fewer genes than in the acoel *Hofstenia* (>22,000; BUSCO\_v5  
427 score ~95%). This said, of the genes found in Urbilateria (orthogroups in our  
428 presence/absence analysis containing a member from both a bilaterian and an  
429 outgroup) *Xenoturbella* and *Hofstenia* have very similar numbers (5459 and 5438  
430 respectively). Gene, intron and exon lengths all also fall within the range seen in many  
431 other invertebrate species<sup>25</sup>. It thus seems that basic genomic features in *Xenoturbella*  
432 are not anomalous among Bilateria. Unlike some extremely simplified animals, such  
433 as orthonectids, we observe no extreme reduction in gene content.

434 All classes of homeodomain transcription factors have previously been reported  
435 to exist in Xenacoelomorpha<sup>43</sup>. We have identified 5 HOX-genes in *X. bocki* and at  
436 least four, and probably all five of these are on one chromosomal scaffold within 187  
437 Kbp. *X. bocki* also has the parahox genes *Gsx* and *Cdx*; while *Xlox/pdx* is not found,  
438 it is present in Cnidarians and must therefore have been lost<sup>44</sup>. If block duplication  
439 models of Hox and Parahox evolutionary relationships are correct, the presence of a  
440 complete set of parahox genes implies the existence of their Hox paralogs in the  
441 ancestor of Xenacoelomorphs suggesting the xenacoelomorph ancestor also  
442 possessed a Hox 3 ortholog. If anthozoans also have an ortholog of bilaterian Hox 2<sup>45</sup>,  
443 this must also have been lost from Xenacoelomorphs. The minimal number of Hox  
444 genes in the xenacoelomorph stem lineage was therefore probably 7 (AntHox1, lost  
445 Hox2, lost Hox 3, CentHox 1, CentHox 2, CentHox 3 and postHoxP).

446 Based on early sequencing technology and without a reference genome  
447 available, it was thought that Acoelomorpha lack many bilaterian microRNAs. Using  
448 deep sequencing of small RNAs and our high-quality genome, we have shown that  
449 *Xenoturbella* shows a near-complete bilaterian set of miRNAs including the single

450 deuterostome-specific miRNA family (MIR-103) (Figure X). The low number of  
451 differential family losses of *Xenoturbella* (8 of 31 bilaterian miRNA families) inferred is  
452 the same as the number lost in the flatworm *Schmidtea*, and substantially lower than  
453 the number lost in the rotifer *Brachionus* (which has lost 14 bilaterian families). It is  
454 worth mentioning that *X. bocki* shares the absence of one miRNA family (MIR-216)  
455 with all Ambulacrarians although if Deuterostomia are paraphyletic this could be  
456 interpretable as a primitive state<sup>35</sup>.

457 The last decade has seen a re-evaluation of our understanding of the evolution  
458 of the neuropeptide signaling genes<sup>46,47</sup>. The peptidergic systems are thought to have  
459 undergone a diversification that produced approximately 30 systems in the bilaterian  
460 common ancestor<sup>46,47</sup>. Our study identified 31 neuropeptide systems in *X.bocki* and  
461 for all of these either the ligand, receptor, or both are also present in both protostomes  
462 and deuterostomes indicating conservation across Bilateria. It is likely that more  
463 ligands (which are short and variable) remain to be found with better detection  
464 methods. It appears that the *Xenoturbella* genome contains a nearly complete  
465 bilaterian neuropeptide complement with no signs of simplification but rather signs of  
466 expansions of certain gene families. Our analyses also reveal a potential  
467 synapomorphy linking Xenacoelomorpha with Ambulacraria (Fig 4 and  
468 Supplementary).

469 We have used the predicted presence and absence of genes across a selection  
470 of metazoan genomes as characters for phylogenetic analyses. Our trees re-confirm  
471 the findings of recent phylogenomic gene alignment studies in linking *Xenoturbella* to  
472 the Ambulacraria. We also used these data to test different bilaterians for their  
473 propensity to lose otherwise conserved genes (or for our inability to identify  
474 orthologs<sup>30</sup>). While the degree of gene loss appears similar between *Xenoturbella* and  
475 acoels, the phylogenetic analysis shows longer branches leading to the acoels, most  
476 likely due to faster evolution, gain of lineages specific genes, and some degree of  
477 gene loss in the branch leading to the Acoelomorpha. Recent work has shown the  
478 tendency of rapidly evolving genes (such as those belonging to rapidly evolving  
479 species) to be missed by orthology detection software<sup>48,49</sup>.

480

481 This pattern of conservation of evolutionarily old parts of the Metazoan genome  
482 is further reinforced by the retention in *Xenoturbella* of linkage groups present from  
483 sponges to vertebrates. It is interesting to note that *X. bocki* does not follow the pattern

484 seen in other morphologically simplified animals such as nematodes and  
485 platyhelminths, which have lost and/or fused these ancestral linkage groups. We  
486 interpret this to be a signal of comparably slower genomic evolution in *Xenoturbella* in  
487 comparison to some other bilaterian lineages. The fragmented genome sequence of  
488 *Hofstenia* prevents us from asking whether the ancient linkage groups have also been  
489 preserved in the Acoelomorpha.

490 One of the chromosome-scale scaffolds in our assembly showed a different  
491 methylation and age signal, with both older and younger genes, and no clear  
492 relationship to metazoan linkage groups. By analyzing orthogroups of genes on this  
493 scaffold for their phylogenetic signal and finding *X. bocki* genes to cluster with those  
494 of *X. profunda* we concluded that the scaffold most likely does not represent a  
495 contamination. It remains unclear whether this scaffold is a fast-evolving chromosome,  
496 or a chromosomal fragment or arm. Very fast evolution on a chromosomal arm has for  
497 example been shown in the zebrafish<sup>50</sup>.

498 Apart from DNA from *X. bocki* we also obtained a highly contiguous genome of  
499 a species related to marine *Chlamydia* species (known from microscopy to exist in *X.*  
500 *bocki*); a symbiotic relationship between *Xenoturbella* and the bacteria has been  
501 thought possible<sup>51</sup>. The large gene number and the completeness of genetic pathways  
502 we found in the chlamydial genome do not support an endosymbiotic relationship.

503 Overall, we have shown that, while *Xenoturbella* has lost some genes - in  
504 addition to the reduced number of Hox genes previously noted, we observe a reduction  
505 of some signaling pathways to the core components - in general, the *X. bocki* genome  
506 is not strikingly simpler than many other bilaterian genomes. We do not find  
507 support for a strong version of the Nephrozoa hypothesis which would predict many  
508 missing bilaterian genes. Bilaterian Hox and microRNA absent from Acoelomorpha  
509 are found in *Xenoturbella* eliminating the impact of two character types that were  
510 previously cited in support of Nephrozoa. The *Xenoturbella* genome has also largely  
511 retained the ancestral linkage groups found in other bilaterians and does not represent  
512 a structure intermediate between Eumetazoan and bilaterian ground states. Overall,  
513 while we can rule out a strong version of the Nephrozoa hypothesis with many  
514 Bilaterian characteristics missing in xenacoelomorphs, our analysis of the  
515 *Xenoturbella* genome cannot distinguish between a weak version of Nephrozoa and  
516 the Xenambulacraria topology; nevertheless, our phylogenetic analysis of gene  
517 presence and absence supports the latter.

518

## 519 **Methods**

### 520 **Genome Sequencing, Assembly, and Scaffolding**

521 We extracted DNA from individual *Xenoturbella* specimens with a standard and  
522 additionally worked with a Phenol-Chloroform protocol specifically developed to  
523 extract HMW DNA ([dx.doi.org/10.17504/protocols.io.mrxc57n](https://doi.org/10.17504/protocols.io.mrxc57n)). The extracted DNA  
524 was quality controlled with a Nanodrop instrument in our laboratory and subsequently  
525 a TapeStation at the sequencing center. Worms were first starved and kept in  
526 repeatedly replaced salt water, reducing the likelihood of food or other contaminants  
527 in the DNA extractions. First, we sequenced Illumina short paired-end reads and mate  
528 pair libraries (see ref <sup>3</sup> for details). As the initial paired-read datasets were of low  
529 complexity and coverage, we later complemented these data with an Illumina HiSeq  
530 2000/2500 series paired-end dataset with ~700 bp insert size and 250bp read lengths,  
531 yielding ~354 Million reads. Additionally, we generated ~40 Million  
532 Illumina TruSeq Synthetic Long Reads (TSLR) for high confidence primary  
533 scaffolding.

534 After read cleaning with Trimmomatic v.0.38<sup>52</sup> we conducted initial test assemblies  
535 using the clc assembly cell v.5 and ran the blobtools pipeline<sup>53</sup> to screen for  
536 contamination (Supplementary). Not detecting any significant numbers of reads from  
537 suspicious sources in the HiSeq dataset we used SPAdes v. 3.9.0<sup>20</sup> to correct and  
538 assemble a first draft genome. We also tried to use dipSPAdes but found the runtime  
539 to exceed several weeks without finishing. We submitted the SPAdes assembly to the  
540 redundans pipeline to eliminate duplicate contigs and to scaffold with all available mate  
541 pair libraries. The resulting assembly was then further scaffolded with the aid of  
542 assembled transcripts (see below) in the BADGER pipeline<sup>54</sup>. In this way we were able  
543 to obtain a draft genome with ~60kb N50 that could be scaffolded to chromosome  
544 scale super-scaffolds with the use of 3C data.

545 We also used two remaining specimens to extract HMW DNA for Oxford Nanopore  
546 PromethION sequencing in collaboration with the Loman laboratory in Birmingham.  
547 Unfortunately, the extraction failed for one individual with the DNA appearing to be  
548 contaminated with a dark coloured residue. We were able to prepare a ligation and a  
549 PCR library for DNA from the second specimen and obtain some genomic data.  
550 However, due to pore blockage on both flow cells the combined data amounted to only

551 about 0.5-fold coverage of the genome and was thus not useful in scaffolding. We  
552 suspect that the dark colouration of the DNA indicates a natural modification to be  
553 present in *X. bocki* DNA that inhibits sequencing with the Oxford Nanopore method.

554 Library preparation for genome-wide bisulfite sequencing was performed as  
555 previously described<sup>55</sup>. The resulting sequencing data were aligned to the *X. bocki*  
556 draft genome using Bismark in non-directional mode to identify the percentage  
557 methylation at each cytosine genome-wide. Only sites with >10 reads mapping were  
558 considered for further analysis.

559

#### 560 Preparation of the Hi-C libraries

561 The Hi-C protocol was adapted at the time from (Lieberman-Aiden et al., 2009; Sexton  
562 et al., 2012 and Marie-Nelly et al., 2014). Briefly, an animal was chemically cross-  
563 linked for one hour at room temperature in 30 mL of PBS 1X added with 3%  
564 formaldehyde (Sigma – F8775 - 4x25 mL). Formaldehyde was quenched for 20 min  
565 at RT by adding 10 ml of 2.5 M glycine. The fixed animal was recovered through  
566 centrifugation and stored at -80°C until use. To prepare the proximity ligation library,  
567 the animal was transferred to a VK05 Precellys tubes in 1X DpnII buffer (New England  
568 Biolabs; 0.5mL) and the tissues were disrupted using the Precellys Evolution  
569 homogenizer (Bertin-Instrument). SDS was added (0.3% final) to the lysate and the  
570 tubes were incubated at 65°C for 20 minutes followed by an incubation at 37°C for 30  
571 minutes and an incubation of 30 minutes after adding 50 µL of 20% triton-X100. 150  
572 units of the DpnII restriction enzyme were then added and the tubes were incubated  
573 overnight at 37°C. The endonuclease was inactivated 20 min at 65°C and the tubes  
574 were then centrifuged at 16,000 x g during 20 minutes, supernatant was discarded  
575 and pellets were re-suspended in 200 µl NE2 1X buffer and pooled. DNA ends were  
576 labeled using 50 µl NE2 10X buffer, 37.5 µl 0.4 mM dCTP-14-biotin, 4.5 µl 10mM  
577 dATP-dGTP-dTTP mix, 10 µl klenow 5 U/µL and incubation at 37°C for 45 minutes.  
578 The labeling mix was then transferred to ligation reaction tubes (1.6 ml ligation buffer;  
579 160 µl ATP 100 mM; 160 µl BSA 10 mg/mL; 50 µl T4 DNA ligase (New England  
580 Biolabs, 5U/µl); 13.8 ml H2O) and incubated at 16°C for 4 hours. A proteinase K mix  
581 was added to each tube and incubated overnight at 65°C. DNA was then extracted,  
582 purified and processed for sequencing as previously described<sup>22</sup>. Hi-C libraries were  
583 sequenced on a NextSeq 500 (2 × 75 bp, paired-end using custom made  
584 oligonucleotides as in Marie-Nelly et al., 2014). Libraries were prepared separately on

585 two individuals in this way but eventually merged. Note that more recent version of the  
586 Hi-C protocol than the one used here have been described elsewhere<sup>56</sup>.

587

588

#### 589 InstaGRAAL assembly pre-processing

590 The primary Illumina assembly contains a number of very short contigs, which are  
591 disruptive when computing the contact distribution needed for the instaGRAAL  
592 proximity ligation scaffolding (pre-release version, see<sup>57</sup> and<sup>22</sup> for details). Testing  
593 several Nx metrics we found a relative length threshold, that depends on the scaffolds'  
594 length distribution, to be a good compromise between the need for a low-noise contact  
595 distribution and the aim of connecting most of the genome. We found N90 a suitable  
596 threshold and excluded contigs below 1,308 bp. This also ensured no scaffolds shorter  
597 than three times the average length of a DpnII restriction fragment (RF) were in the  
598 assembly. In this way every contig contained enough RFs for binning and were  
599 included in the scaffolding step.

600 Reads from both libraries were aligned with bowtie2 (v. 2.2.5)<sup>58</sup> against the  
601 DpnII RFs of the reference assembly using the hicstuff pipeline  
602 (<https://github.com/koszullab/hicstuff>) and in paired-end mode (with the options: -fg-  
603 maxins 5 -fg-very-sensitive-local), with a mapping quality >30. The pre-processed  
604 genome was reassembled using instaGRAAL. Briefly, the program uses a Markov  
605 Chain Monte Carlo (MCMC) method that samples DNA segments (or bins) of the  
606 assembly for their best relative 1D positions with respect to each other. The quality of  
607 the positions is assessed by fitting the contact data first on a simple polymer model,  
608 then on the plot of contact frequency according to the genomic distance law computed  
609 from the data. The best relative position of a DNA segment with respect to one of its  
610 most likely neighbours consists in operations such as flips, swaps, merges or a split  
611 of contigs. Each operation is either accepted or rejected based on the computed  
612 likelihood, resulting in an iterative progression toward the 1D structure that best fits  
613 the contact data. Once the entire set of DNA segments is sampled for position (i.e. a  
614 cycle), the process starts over. The scaffolder was run independently for 50 cycles,  
615 long enough for the chromosome structure to converge. The corresponding genome  
616 is then considered stable and suitable for further analyses. The scaffolded assemblies  
617 were then refined using instaGRAAL's instaPolish module, to correct small artefactual  
618 inversions that are sometimes a byproduct of instaGRAAL's processing.

619

620

## 621 **Genome Annotation**

### 622 Transcriptome Sequencing

623 We extracted total RNA from a single *X. bocki* individual and sequenced a strand  
624 specific Illumina paired end library. Extraction of total RNA was performed using a  
625 modified Trizol & RNeasy hybrid protocol for which tissue had to be stored in RNAlater.  
626 cDNA transcription reaction/cDNA synthesis was done using the RETROscript kit  
627 (Ambion) using both Oligo(dT) and Random Decamer primers. Detailed extraction and  
628 transcription protocols are available from the corresponding authors. The resulting  
629 transcriptomic reads (deposited under [SRX20415651](https://www.ncbi.nlm.nih.gov/sra/SRX20415651)) were assembled with the Trinity  
630 pipeline<sup>59,60</sup> into 103,056 sequences (N50: 705; BUSCO\_v5 Eukaryota scores:  
631 C:65.1%, [S:34.1%, D:31.0%], F:22.0%, M:12.9%) for initial control and then supplied  
632 to the genome annotation pipeline (below).

633

### 634 Repeat annotation

635 In the absence of a repeat library for Xenoturbellida we first used RepeatModeller  
636 v. 1.73 to establish a library *de novo*. We then used RepeatMasker v. 4.1.0  
637 (<https://www.repeatmasker.org>) and the Dfam library<sup>61,62</sup> to soft-mask the genome.  
638 We mapped the repeats to the instaGRAAL scaffolded genome with RepeatMasker.

639

### 640 Gene prediction and annotation

641 We predicted genes using Augustus<sup>63</sup> implemented into the BRAKER (v.2.1.0)  
642 pipeline<sup>23,24</sup> to incorporate the RNA-Seq data. BRAKER uses spliced aligned RNA-  
643 Seq reads to improve training accuracy of the gene finder GeneMark-ET<sup>64</sup>.  
644 Subsequently, a highly reliable gene set predicted by GeneMark-ET in *ab initio* mode  
645 was selected to train the gene finder AUGUSTUS, which in a final step predicted  
646 genes with evidence from spliced aligned RNA-Seq reads. To make use of additional  
647 single cell transcriptome data allowing for a more precise prediction of 3'-UTRs we  
648 employed a production version of BRAKER (August 2018 snapshot). We had  
649 previously mapped the RNA-Seq data to the genome with gmap-gsnap v. 2018-07-  
650 04<sup>65</sup> and used samtools<sup>66</sup> and bamtools<sup>67</sup> to create the necessary input files. This  
651 process was repeated in an iterative way, visually validating gene structures and  
652 comparing with mappings loci inferred from a set of single-cell RNA-Seq data



653 (published elsewhere, see: <sup>68</sup>) in particular regarding fused genes. Completeness of  
654 the gene predictions was independently assessed with BUSCO\_v5<sup>27</sup> setting the  
655 metazoan and the eukaryote datasets as reference respectively on gVolante<sup>69</sup>. We  
656 used InterProScan v. 5.27-66.0 standalone<sup>70,71</sup> on the UCL cluster to annotate the  
657 predicted *X. bocki* proteins with Pfam, SUPERFAM, PANTHER, and Gene3D  
658 information.

659

## 660 Horizontal Gene Transfer

661 To detect horizontally acquired genes in the *X. bocki* genome we used a pipeline  
662 available from (<https://github.com/reubwn/hgt>). Briefly, this uses blasts against the  
663 NCBI database, alignments with MAFFT<sup>72</sup>, and phylogenetic inferences with  
664 IQTree<sup>73,74</sup> to infer most likely horizontally acquired genes, while trying to discard  
665 contamination (e.g. from co-sequenced gut microbiota).

666

## 667 Orthology inference

668 We included 155 metazoan species and outgroups into our orthology analysis. We  
669 either downloaded available proteomes or sourced RNA-Seq reads from online  
670 repositories to then use Trinity v 2.8.5 and Trinotate v. 3.2.0 to predict protein sets.  
671 In the latter case we implemented diamond v. 2.0.0 blast<sup>75,76</sup> searches against UniProt  
672 and Pfam<sup>77</sup> hmm screens against the Pfam-A dataset into the prediction process. We  
673 had initially acquired 185 datasets, but excluded some based on inferior BUSCO  
674 completeness, while at the same time aimed to span as many phyla as possible.  
675 Orthology was then inferred using Orthofinder v. 2.2.7<sup>78,79</sup>, again with diamond as the  
676 blast engine.

677 Using InterProScan v. 5.27-66.0 standalone on all proteomes we added  
678 functional annotation and then employed kinfin<sup>33</sup> to summarise and analyse the  
679 orthology tables. For the kinfin analysis, we tested different query systems in regard  
680 to phylogenetic groupings (Supplementary).

681 To screen for inflation and contraction of gene families we first employed  
682 CAFE5<sup>80</sup>, but found the analysis to suffer from long branches and sparse taxon  
683 sampling in Xenambulacraria. We thus chose to query individual gene families (e.g.  
684 transcription factors) by looking up Pfam annotations in the InterProScan tables of  
685 high-quality genomes in our analysis.

686 Through the GenomeMaple online platform we calculated completeness of

687 signaling pathways within the KEGG database using GhostX as the search engine.

688

#### 689 Presence/absence phylogenetics

690 We used a database of metazoan proteins, updated from ref <sup>81</sup>, as the basis for  
691 an OMA analysis to calculate orthologous groups, performing two separate runs, one  
692 including *Xenoturbella* and acoels, and one with only *Xenoturbella*. We converted  
693 OMA gene OrthologousMatrix.txt files into binary gene presence absence matrices in  
694 Nexus format with datatype = restriction. We calculated phylogenetic trees on these  
695 matrices using RevBayes (see <https://github.com/willpett/metazoa-gene-content> for  
696 RevBayes script), as described in ref 74 with corrections for no absent sites  
697 and no singleton presence, using the reversible, not the Dollo model,  
698 as it is more likely to be able to correct for noise related to  
699 prediction errors <sup>82,78</sup>. For each matrix, two runs were performed and compared and  
700 consensus trees generated with bpcomp from Phylobayes<sup>83</sup>.

701

#### 702 Hox and ParaHox gene cluster identification and characterisation

703 Previous work has already used transcriptomic data and phylogenetic inference  
704 to identify the homeobox repertoire in *Xenoturbella bocki*. These annotations were  
705 used to identify genomic positions and gene annotations that correspond to Hox and  
706 ParaHox clusters in *X. bocki*. Protein sequences of homeodomains (Evx, Cdx, Gsx,  
707 antHox1, centHox1, centHox2, cent3 and postHoxP) were used as TBLASTN queries  
708 to identify putative scaffolds associated with Hox and ParaHox clusters. Gene models  
709 from these scaffolds were compared to the full length annotated homeobox transcripts  
710 from<sup>84</sup> using BLASTP, using hits over 95% identity for homeobox classification. There  
711 were some possible homeodomain containing genes on the scaffolds that were not  
712 previously characterised and were therefore not given an annotation.

713 There were issues concerning the assignment of postHoxP and Evx to gene  
714 models. To ascertain possible CDS regions for these genes, RNA-Seq reads were  
715 mapped with HISAT2 to the scaffold and to previous annotation<sup>84</sup>, were assembled  
716 with Trinity and these were combined with BRAKER annotations.

717 Some issues were also observed with homeodomain queries matching genomic  
718 sequences that were identical, suggesting artefactual duplications. To investigate  
719 contiguity around genes the ONT reads were aligned with Minimap2 to capture long  
720 reads over regions and coverage.

721

722

### 723 Small RNA Sequencing and Analysis

724 Two samples of starved worms were subjected to 5' monophosphate dependent  
725 sequencing of RNAs between 15 and 36 nucleotides in length, according to previously  
726 described methods<sup>85</sup>. Using miRTrace<sup>86</sup> 3.3, 18.6 million high-quality reads were  
727 extracted and merged with the 27 635 high quality 454 sequencing reads from Philippe  
728 et al. The genome sequence was screened for conserved miRNA precursors using  
729 MirMachine<sup>87</sup> followed by a MirMiner run that used predicted precursors and  
730 processed and merged reads on the genome<sup>88</sup>. Outputs of MirMachine and MirMiner  
731 were manually curated using a uniform system for the annotation of miRNA genes<sup>89</sup>  
732 and by comparing to MirGeneDB<sup>90</sup>.

733

### 734 Neuropeptide prediction and screen

735 Neuropeptide prediction was conducted on the full set of *X.bocki* predicted  
736 proteins using two strategies to detect neuropeptide sequence signatures. First, using  
737 a custom script detecting the occurrence of repeated sequence patterns:  
738 RRx(3,36)RRx(3,36)RRx(3,36)RR,RRx(2,35)ZRRx(2,35)ZRR,  
739 RRx(2,35)GRRx(2,35)GRR, RRx(1,34)ZGRRx(1,34)ZGRR where R=K or R; x=any  
740 amino acid; Z=any amino acid but repeated within the pattern. Second, using  
741 HMMER3.1<sup>91</sup> (hmmer.org), and a combination of neuropeptide HMM models obtained  
742 from the PFAM database (pfam.xfam.org) as well as a set of custom HMM models  
743 derived from alignment of curated sets of neuropeptide sequences<sup>46,47,92</sup>. Sequences  
744 retrieved using both methods and comprising fewer than 600 amino acids were further  
745 validated. First, by blast analysis: sequences with E-Value ratio “best blast hit versus  
746 ncbi nr database/best blast hit versus curated neuropeptide dataset” < 1e-40 were  
747 discarded. Second by reciprocal best blast hit clustering using Clans<sup>93</sup>  
748 (eb.tuebingen.mpg.de/protein-evolution/software/clans/) with a set of curated  
749 neuropeptide sequences<sup>46</sup>. SignalP-5.0<sup>94</sup> (cbs.dtu.dk/services/SignalP/) was used to  
750 detect the presence of a signal peptide in the curated list of predicted neuropeptide  
751 sequences while Neuropred<sup>95</sup> (stagbeetle.animal.uiuc.edu/cgi-bin/neuropred.py) was  
752 used to detect cleavage sites and post-translational modifications. Sequence  
753 homology of the predicted sequence with known groups was analysed using a  
754 combination of (i) blast sequence similarity with known bilaterian neuropeptide

755 sequences, (ii) reciprocal best blast hit clustering using Clans and sets of curated  
756 neuropeptide sequences, (iii) phylogeny using MAFFT  
757 ([mafft.cbrc.jp/alignment/server/](http://mafft.cbrc.jp/alignment/server/)), TrimAl<sup>96</sup> ([trimal.cgenomics.org/](http://trimal.cgenomics.org/)) and IQ-TREE<sup>97</sup>  
758 webserver for alignment, trimming and phylogeny inference respectively. Bilaterian  
759 prokineticin-like sequences were searched in ncbi nucleotide, EST and SRA  
760 databases as well as in the *Saccoglossus kowalevskii* genome assembly<sup>74,98</sup>  
761 ([groups.oist.jp/molgenu](http://groups.oist.jp/molgenu)) using various bilaterian prokineticin-related protein  
762 sequences as query. Sequences used for alignments shown in figures were collected  
763 from ncbi nucleotide and protein databases as well as from the following publications:  
764 7B2<sup>46</sup>; NucB2<sup>92</sup>; Insulin<sup>99</sup>; Prokineticin<sup>37,38,100</sup>. Alignments for figures were created with  
765 Jalview ([jalview.org](http://jalview.org)).

766

### 767 Neuropeptide receptor search

768 §Neuropeptide Receptor sequences for Rhodopsin type GPCR, Secretin type GPCR  
769 and tyrosine and serine/threonine kinase receptors were searched by running  
770 HMMER3.1 on the full set of *X.bocki* predicted proteins using the 7tm\_1 (PF00001),  
771 7tm\_2 (PF00002) and PK\_Tyr\_Ser-Thr (PF07714) HMM models respectively which  
772 were obtained from the PFAM database ([pfam.xfam.org](http://pfam.xfam.org)). Sequences above the  
773 significance threshold were then aligned with sequences from the curated dataset,  
774 trimmed and phylogeny inference was conducted using same method as for the  
775 neuropeptide. A second alignment and phylogeny inference was conducted after  
776 removal of all *X.bocki* sequences having no statistical support for grouping with any of  
777 the known neuropeptide receptors from the curated dataset. Curated datasets were  
778 collected from the following publications: Rhodopsin type GPCR beta and gamma and  
779 Secretin type GPCR<sup>100</sup>; Rhodopsin type GPCR delta (Leucine-rich repeat-containing  
780 G-protein coupled Receptors)<sup>101</sup>; Tyrosine kinase receptors<sup>102,103</sup>; and were  
781 complemented with sequences from NCBI protein database.

782

### 783 Synteny

784 Ancestral linkage analyses rely on mutual-best-hits computed using Mmseqs2<sup>104</sup>  
785 between pairs of species in which chromosomal assignments to ancestral linkage  
786 groups (ALG) was previously performed, such as *Branchiostoma floridae* or *Pecten*  
787 *maximus*<sup>39</sup>. Oxford dotplots were computed by plotting reciprocal positions of indexed  
788 pairwise orthologs between two species as performed previously<sup>39,40</sup>. The significance

789 of ortholog enrichment in pairs of chromosomes was assessed using a fisher test.  
790 We also used a Python implementation of MCscanX<sup>105</sup> (Haibao Tang and available  
791 on [https://github.com/tanghaibao/jcvi/wiki/MCscan-\(Python-version\)](https://github.com/tanghaibao/jcvi/wiki/MCscan-(Python-version))) to compare *X.*  
792 *bocki* to *Euphydtia muelleri*, *Trichoplax adhaerens*, *Branchiostoma floridae*,  
793 *Saccoglossus kowalevskii*, *Ciona intestinalis*, *Nematostella vectensis*, *Asteria rubens*,  
794 *Pecten maximus*, *Nemopilema nomurai*, *Carcinoscorpius rotundicauda* (see  
795 Supplementary). Briefly, the pipeline uses high quality genomes and their annotations  
796 to infer syntenic blocks based on proximity. For this an all vs. all blastp is performed  
797 and synteny extended from anchors identified in this way. Corresponding heatmaps  
798 (see Supplementary) were plotted with Python in a Jupyter notebooks instance.

799

### 800 *Chlamydia* assembly and annotation

801 We identified a highly contiguous *Chlamydia* genome in the *X. bocki* genome  
802 assembly using blast. We then used our Oxford Nanopore derived long-reads to  
803 scaffold the *Chlamydia* genome with LINKS<sup>106</sup> and annotated it with the automated  
804 PROKKA pipeline. To place the genome on the *Chlamydia* tree we extracted the 16S  
805 ribosomal RNA gene sequence, aligned it with set of *Chlamydia* 16S rRNA sequences  
806 from<sup>28</sup> using MAFFT, and reconstructed the phylogeny using IQ-TREE 2<sup>73</sup> We  
807 visualized the resulting tree with Figtree (<http://tree.bio.ed.ac.uk/>).

808

809

### 810 **Acknowledgements**

811 We thank Josh Quick and Nick Loman for help with the generation of ONT long-read  
812 data. Analyses were conducted mainly on the UCL Cluster, with some computations  
813 also run on the CHEOPS cluster at the University of Cologne. We are grateful to Kevin  
814 J. Peterson for his comments on the manuscript, the miRNA section in particular. We  
815 thank the Kristineberg Center for Marine Research and Innovation for their essential  
816 support in sampling *Xenoturbella*.

817

### 818 **Conflict of interest**

819 The authors declare no conflict of interest.

820

### 821 **Data availability**

822 All read sets (RNA and DNA derived) used in this study will be made available with  
823 the publication of this manuscript on the SRA database under the BioProject ID  
824 PRJNA864813. Hi-C reads are deposited under SAMN30224387, RNA-Seq under  
825 SAMN35083895. The genome assemblies of *X. bocki* (ERS12565994,

826 ERA16814408) and the *Chlamydia* sp. (ERS12566084, ERA16814775) are  
827 deposited under PRJEB55230 at ENA.

828

### 829 **Funding**

830 PHS was funded by an ERC grant (ERC-2012-AdG 322790) to MJT, which also  
831 supported HR, ACZ, SM. PHS was also funded through an Emmy-Noether grant  
832 (434028868) to himself. Part of this work was funded by BBSRC grant  
833 BB/R016240/1 (M.J.T./P.K.), by a Leverhulme Trust Research Project Grant RPG-  
834 2018-302 (M.J.T./D.J.L.), and by the European Union's Horizon 2020 research and  
835 innovation program under the Marie Skłodowska-Curie grant agreement no 764840  
836 IGNITE (M.J.T./P.N.).

837 **References**

- 838 1. Telford, M. J. Xenoturbellida: the fourth deuterostome phylum and the diet of worms.  
839 *Genesis (New York, N.Y. : 2000)* 46, 580–586 (2008).
- 840 2. Westblad, E. *Xenoturbella bocki* n. g., n. sp., a peculiar, primitive Turbellarian type. *Arkiv*  
841 *för Zoologi* 3–29 (1949).
- 842 3. Philippe, H. *et al.* Mitigating Anticipated Effects of Systematic Errors Supports Sister-  
843 Group Relationship between Xenacoelomorpha and Ambulacraria. *Current Biology* 29, 1818-  
844 1826.e6 (2019).
- 845 4. Cannon, J. T. *et al.* Xenacoelomorpha is the sister group to Nephrozoa. *Nature* 530, 89–93  
846 (2016).
- 847 5. Ueki, T., Arimoto, A., Tagawa, K. & Satoh, N. Xenacoelomorph-Specific Hox Peptides:  
848 Insights into the Phylogeny of Acoels, Nemertodermatids, and Xenoturbellids. *Zool Sci* 36,  
849 395–401 (2019).
- 850 6. Hejnol, A. *et al.* Assessing the root of bilaterian animals with scalable phylogenomic  
851 methods. *Proceedings. Biological sciences / The Royal Society* 276, 4261–4270 (2009).
- 852 7. Rouse, G. W., Wilson, N. G., Carvajal, J. I. & Vrijenhoek, R. C. New deep-sea species of  
853 *Xenoturbella* and the position of Xenacoelomorpha. *Nature* 530, 94–97 (2016).
- 854 8. Srivastava, M., Mazza-Curll, K. L., Wolfswinkel, J. C. van & Reddien, P. W. Whole-body  
855 acoel regeneration is controlled by Wnt and Bmp-Admp signaling. *Current Biology* 24,  
856 1107–1113 (2014).
- 857 9. Philippe, H. *et al.* Acoelomorph flatworms are deuterostomes related to *Xenoturbella*.  
858 *Nature* 470, 255–258 (2011).
- 859 10. Bourlat, S. J. *et al.* Deuterostome phylogeny reveals monophyletic chordates and the new  
860 phylum Xenoturbellida. *Nature* 444, 85–88 (2006).
- 861 11. Nakano, H. What is *Xenoturbella*? *Zoological Letters* 1, 1 (2015).
- 862 12. Hejnol, A. & Martindale, M. Q. Acoel development supports a simple planula-like  
863 urbilaterian. *Philosophical transactions of the Royal Society of London. Series B, Biological*  
864 *sciences* 363, 1493–1501 (2008).
- 865 13. Martynov, A. *et al.* Multiple paedomorphic lineages of soft-substrate burrowing  
866 invertebrates: parallels in the origin of *Xenocratena* and *Xenoturbella*. *Plos One* 15,  
867 e0227173 (2020).
- 868 14. Westheide, W. Progenesis as a principle in meiofauna evolution. *J Nat Hist* 21, 843–854  
869 (1987).
- 870 15. Sempere, L. F., Cole, C. N., McPeck, M. A. & Peterson, K. J. The phylogenetic  
871 distribution of metazoan microRNAs: insights into evolutionary complexity and constraint.  
872 *306, 575–588* (2006).

- 873 16. Gehrke, A. R. *et al.* Acoel genome reveals the regulatory landscape of whole-body  
874 regeneration. *Science* 363, 1–9 (2019).
- 875 17. Arimoto, A. *et al.* A draft nuclear-genome assembly of the acoel flatworm *Praesagittifera*  
876 *naikaiensis*. *Gigascience* 8, giz023 (2019).
- 877 18. Martinez, P. *et al.* Genome assembly of the acoel flatworm *Symsagittifera roscoffensis*, a  
878 model for research on body plan evolution and photosymbiosis. *G3 Genes Genomes Genetics*  
879 13, jkac336 (2022).
- 880 19. Moroz, L. L., Romanova, D. Y. & Kohn, A. B. Neural versus alternative integrative  
881 systems: molecular insights into origins of neurotransmitters. *Philosophical Transactions*  
882 *Royal Soc Lond Ser B Biological Sci* 376, 20190762 (2021).
- 883 20. Bankevich, A. *et al.* SPAdes: a new genome assembly algorithm and its applications to  
884 single-cell sequencing. *www.liebertpub.com* 19, 455–477 (2012).
- 885 21. Prysycz, L. P. & Gabaldón, T. Redundans: an assembly pipeline for highly heterozygous  
886 genomes. *Nucleic Acids Research* 44, e113–e113 (2016).
- 887 22. Baudry, L. *et al.* instaGRAAL: chromosome-level quality scaffolding of genomes using a  
888 proximity ligation-based scaffold. *Genome Biol* 21, 148 (2020).
- 889 23. Hoff, K. J., Lomsadze, A., Borodovsky, M. & Stanke, M. Whole-genome annotation with  
890 BRAKER. *Methods Mol Biology Clifton N J* 1962, 65–95 (2019).
- 891 24. Hoff, K. J., Lange, S., Lomsadze, A., Borodovsky, M. & Stanke, M. BRAKER1:  
892 Unsupervised RNA-Seq-Based Genome Annotation with GeneMark-ET and AUGUSTUS.  
893 *Bioinformatics* 32, 767–769 (2016).
- 894 25. Francis, W. R. & Wörheide, G. Similar ratios of introns to intergenic sequence across  
895 animal genomes. *Genome Biol Evol* 9, evx103- (2017).
- 896 26. Seemann, T. Prokka: rapid prokaryotic genome annotation. *Bioinform Oxf Engl* 30, 2068–  
897 9 (2014).
- 898 27. Simão, F. A., Waterhouse, R. M., Ioannidis, P., Kriventseva, E. V. & Zdobnov, E. M.  
899 BUSCO: assessing genome assembly and annotation completeness with single-copy  
900 orthologs. 31, 3210–3212 (2015).
- 901 28. Dharamshi, J. E. *et al.* Marine sediments illuminate Chlamydiae diversity and evolution.  
902 *Curr Biol* 30, 1032-1048.e7 (2020).
- 903 29. Kjeldsen, K. U., Obst, M., Nakano, H., Funch, P. & Schramm, A. Two types of  
904 endosymbiotic bacteria in the enigmatic marine worm *Xenoturbella bocki*. 76, 2657–2662  
905 (2010).
- 906 30. Natsidis, P., Kapli, P., Schiffer, P. H. & Telford, M. J. Systematic errors in orthology  
907 inference and their effects on evolutionary analyses. *Iscience* 102110 (2021).



- 908 31. Schiffer, P. H., Robertson, H. E. & Telford, M. J. Orthonectids are highly degenerate  
909 annelid worms. *Current Biology* 1–9 (2018).
- 910 32. Mikhailov, K. V. *et al.* The genome of *Intoshia linei* affirms orthonectids as highly  
911 simplified spiraliens. *Current Biology* 26, 1768–1774 (2016).
- 912 33. Laetsch, D. R., Laetsch, D. R., Blaxter, M. L. & Blaxter, M. L. KinFin: Software for  
913 taxon-aware analysis of clustered protein sequences. *G3 (Bethesda, Md.)* 7, 3349–3357  
914 (2017).
- 915 34. Takami, H. *et al.* An automated system for evaluation of the potential functionome:  
916 MAPLE version 2.1.0. *Dna Res* 23, 467–475 (2016).
- 917 35. Kapli, P. *et al.* Lack of support for Deuterostomia prompts reinterpretation of the first  
918 Bilateria. *Sci Adv* 7, eabe2741 (2021).
- 919 36. Thiel, D., Franz-Wachtel, M., Aguilera, F. & Hejnol, A. Xenacoelomorph  
920 neuropeptidomes reveal a major expansion of neuropeptide systems during early bilaterian  
921 evolution. *Molecular Biology And Evolution* 35, 2528–2543 (2018).
- 922 37. Negri, L. & Ferrara, N. The Prokineticins: neuromodulators and mediators of  
923 inflammation and myeloid cell-dependent angiogenesis. *Physiol Rev* 98, 1055–1082 (2018).
- 924 38. Ericsson, L. & Söderhäll, I. Astakines in arthropods—phylogeny and gene structure. *Dev*  
925 *Comp Immunol* 81, 141–151 (2018).
- 926 39. Simakov, O. *et al.* Deeply conserved synteny resolves early events in vertebrate  
927 evolution. *Nat Ecol Evol* 1–11 (2020).
- 928 40. Simakov, O. *et al.* Deeply conserved synteny and the evolution of metazoan  
929 chromosomes. *Sci Adv* 8, eabi5884 (2022).
- 930 41. Rouse, G. W., Wilson, N. G., Carvajal, J. I. & Vrijenhoek, R. C. New deep-sea species of  
931 *Xenoturbella* and the position of Xenacoelomorpha. *Nature* 530, 94–97 (2016).
- 932 42. Hejnol, A. Acoelomorpha and Xenoturbellida. in 203–214 (Springer Vienna, 2015).
- 933 43. Brauchle, M. *et al.* Xenacoelomorpha survey reveals that all 11 animal homeobox gene  
934 classes were present in the first bilaterians. *Genome Biol Evol* 10, 2205–2217 (2018).
- 935 44. Jimenez-Guri, E., Paps, J., Garcia-Fernandez, J. & Salo, E. Hox and ParaHox genes in  
936 Nemertodermatida, a basal bilaterian clade. *Int J Dev Biology* 50, 675–679 (2006).
- 937 45. Ryan, J. F. *et al.* The cnidarian-bilaterian ancestor possessed at least 56 homeoboxes:  
938 evidence from the starlet sea anemone, *Nematostella vectensis*. *Genome Biol* 7, R64–R64  
939 (2006).
- 940 46. Jekely, G. Global view of the evolution and diversity of metazoan neuropeptide signaling.  
941 *Proc National Acad Sci* 110, 8702–8707 (2013).

- 942 47. Mirabeau, O. & Joly, J.-S. Molecular evolution of peptidergic signaling systems in  
943 bilaterians. *Proc National Acad Sci* 110, E2028–E2037 (2013).
- 944 48. Natsidis, P., Kapli, P., Schiffer, P. H. & Telford, M. J. Systematic errors in orthology  
945 inference and their effects on evolutionary analyses. *iScience* 24, 102110 (2021).
- 946 49. Weisman, C. M., Murray, A. W. & Eddy, S. R. Many, but not all, lineage-specific genes  
947 can be explained by homology detection failure. *Plos Biol* 18, e3000862 (2020).
- 948 50. Howe, K. *et al.* Structure and evolutionary history of a large family of NLR proteins in  
949 the zebrafish. *Open Biology* 6, 160009 (2016).
- 950 51. Pillonel, T., Bertelli, C. & Greub, G. Environmental metagenomic assemblies reveal  
951 seven new highly divergent chlamydial lineages and hallmarks of a conserved intracellular  
952 lifestyle. *Front Microbiol* 9, 79 (2018).
- 953 52. Bolger, A. M., Lohse, M. & Usadel, B. Trimmomatic: a flexible trimmer for Illumina  
954 sequence data. *Bioinformatics* 30, 2114–2120 (2014).
- 955 53. Laetsch, D. R. & Blaxter, M. L. BlobTools: Interrogation of genome assemblies.  
956 *F1000research* 6, 1287 (2017).
- 957 54. Elsworth, B., Jones, M. & Blaxter, M. Badger--an accessible genome exploration  
958 environment. *Bioinformatics* 29, 2788–2789 (2013).
- 959 55. Lewis, S. H. *et al.* Widespread conservation and lineage-specific diversification of  
960 genome-wide DNA methylation patterns across arthropods. *Plos Genet* 16, e1008864 (2020).
- 961 56. Lafontaine, D. L., Yang, L., Dekker, J. & Gibcus, J. H. Hi-C 3.0: improved protocol for  
962 genome-wide chromosome conformation capture. *Curr Protoc* 1, e198 (2021).
- 963 57. Marie-Nelly, H. *et al.* High-quality genome (re)assembly using chromosomal contact  
964 data. *Nat Commun* 5, 5695 (2014).
- 965 58. Langmead, B. & Salzberg, S. L. Fast gapped-read alignment with Bowtie 2. *Nature*  
966 *Methods* 9, 357–359 (2012).
- 967 59. Haas, B. J. *et al.* De novo transcript sequence reconstruction from RNA-Seq: reference  
968 generation and analysis with Trinity. 8, 1494–1512 (2013).
- 969 60. *RNA-Seq De novo Assembly Using Trinity*. 1–7 (2015).
- 970 61. Wheeler, T. J. *et al.* Dfam: a database of repetitive DNA based on profile hidden Markov  
971 models. *Nucleic Acids Res* 41, D70–D82 (2013).
- 972 62. Hubley, R. *et al.* The Dfam database of repetitive DNA families. *Nucleic Acids Res* 44,  
973 D81–D89 (2016).
- 974 63. Stanke, M. & Waack, S. Gene prediction with a hidden Markov model and a new intron  
975 submodel. *Bioinformatics* 19 Suppl 2, ii215-25 (2003).

- 976 64. Lomsadze, A., Burns, P. D. & Borodovsky, M. Integration of mapped RNA-Seq reads  
977 into automatic training of eukaryotic gene finding algorithm. *Nucleic Acids Res* 42, e119–  
978 e119 (2014).
- 979 65. Wu, T. D., Reeder, J., Lawrence, M., Becker, G. & Brauer, M. J. GMAP and GSNAP for  
980 Genomic Sequence Alignment: Enhancements to Speed, Accuracy, and Functionality.  
981 *Methods Mol Biology Clifton N J* 1418, 283–334 (2016).
- 982 66. Li, H. *et al.* The Sequence Alignment/Map format and SAMtools. *Bioinformatics* 25,  
983 2078–2079 (2009).
- 984 67. Barnett, D. W., Garrison, E. K., Quinlan, A. R., Strömberg, M. P. & Marth, G. T.  
985 BamTools: a C++ API and toolkit for analyzing and managing BAM files. *Bioinformatics* 27,  
986 1691–1692 (2011).
- 987 68. Robertson, H. E. *et al.* Single cell atlas of *Xenoturbella bocki* highlights the limited cell-  
988 type complexity of a non-vertebrate deuterostome lineage. *Biorxiv* 2022.08.18.504214 (2022)  
989 doi:10.1101/2022.08.18.504214.
- 990 69. Nishimura, O., Hara, Y. & Kuraku, S. gVolante for standardizing completeness  
991 assessment of genome and transcriptome assemblies. *Bioinformatics* 33, 3635–3637 (2017).
- 992 70. Jones, P. *et al.* InterProScan 5: genome-scale protein function classification.  
993 *Bioinformatics* 30, 1236–1240 (2014).
- 994 71. Mulder, N. & Apweiler, R. InterPro and InterProScan: tools for protein sequence  
995 classification and comparison. *Methods in molecular biology (Clifton, N.J.)* 396, 59–70  
996 (2007).
- 997 72. Katoh, K. & Standley, D. M. MAFFT Multiple Sequence Alignment Software Version 7:  
998 Improvements in Performance and Usability. *Mol Biol Evol* 30, 772–780 (2013).
- 999 73. Minh, B. Q. *et al.* IQ-TREE 2: New models and efficient methods for phylogenetic  
1000 inference in the genomic era. *Mol Biol Evol* 37, 1530–1534 (2020).
- 1001 74. Nguyen, L.-T., Schmidt, H. A., Haeseler, A. von & Minh, B. Q. IQ-TREE: A fast and  
1002 effective stochastic algorithm for estimating maximum-likelihood phylogenies. *Mol Biol Evol*  
1003 32, 268–274 (2015).
- 1004 75. Buchfink, B., Xie, C. & Huson, D. H. Fast and sensitive protein alignment using  
1005 DIAMOND. *Nature Methods* 12, 59–60 (2014).
- 1006 76. Buchfink, B., Reuter, K. & Drost, H.-G. Sensitive protein alignments at tree-of-life scale  
1007 using DIAMOND. *Nat Methods* 18, 366–368 (2021).
- 1008 77. Finn, R. D. *et al.* The Pfam protein families database: towards a more sustainable future.  
1009 *Nucleic Acids Research* 44, D279-85 (2016).
- 1010 78. Emms, D. M. & Kelly, S. OrthoFinder: phylogenetic orthology inference for comparative  
1011 genomics. *Genome Biol* 20, 238 (2019).

- 1012 79. Emms, D. M. & Kelly, S. OrthoFinder: solving fundamental biases in whole genome  
1013 comparisons dramatically improves orthogroup inference accuracy. *Genome Biology* 16, E9-  
1014 13 (2015).
- 1015 80. Han, M. V., Thomas, G. W. C., Lugo-Martinez, J. & Hahn, M. W. Estimating gene gain  
1016 and loss rates in the presence of error in genome assembly and annotation using CAFE 3. *Mol*  
1017 *Biol Evol* 30, 1987–1997 (2013).
- 1018 81. Leclère, L. *et al.* The genome of the jellyfish *Clytia hemisphaerica* and the evolution of  
1019 the cnidarian life-cycle. *Nat. Ecol. Evol.* 1–41 (2019).
- 1020 82. Pett, W. *et al.* The Role of Homology and Orthology in the Phylogenomic Analysis of  
1021 Metazoan Gene Content. *Mol Biol Evol*, 1–7 (2019).
- 1022 83. Lartillot, N., Lepage, T. & Blanquart, S. PhyloBayes 3: a Bayesian software package for  
1023 phylogenetic reconstruction and molecular dating. 25, 2286–2288 (2009).
- 1024 84. Brauchle, M. *et al.* Xenacoelomorpha survey reveals that all 11 animal homeobox gene  
1025 classes were present in the first bilaterians. *Genome biology and evolution* (2018)  
1026 doi:10.1093/gbe/evy170.
- 1027 85. Sarkies, P. *et al.* Ancient and novel small RNA pathways compensate for the loss of  
1028 piRNAs in multiple independent nematode lineages. *Plos Biol* 13, e1002061 (2015).
- 1029 86. Kang, W. *et al.* miRTrace reveals the organismal origins of microRNA sequencing data.  
1030 *Genome Biol* 19, 213 (2018).
- 1031 87. Umu, S. U. *et al.* Accurate microRNA annotation of animal genomes using trained  
1032 covariance models of curated microRNA complements in MirMachine. *Biorxiv*  
1033 2022.11.23.517654 (2023).
- 1034 88. Wheeler, B. M. *et al.* The deep evolution of metazoan microRNAs. *Evol Dev* 11, 50–68  
1035 (2009).
- 1036 89. Fromm, B. *et al.* A uniform system for the annotation of vertebrate microRNA genes and  
1037 the evolution of the human microRNAome. *Annu Rev Genet* 49, 213–242 (2015).
- 1038 90. Fromm, B. *et al.* MirGeneDB 2.1: toward a complete sampling of all major animal phyla.  
1039 *Nucleic Acids Res* 50, D204–D210 (2022).
- 1040 91. Johnson, L. S., Eddy, S. R. & Portugaly, E. Hidden Markov model speed heuristic and  
1041 iterative HMM search procedure. *Bmc Bioinformatics* 11, 431–431 (2010).
- 1042 92. Zandawala, M. *et al.* Discovery of novel representatives of bilaterian neuropeptide  
1043 families and reconstruction of neuropeptide precursor evolution in ophiuroid echinoderms.  
1044 *Open Biol* 7, 170129 (2017).
- 1045 93. Frickey, T. & Lupas, A. CLANS: a Java application for visualizing protein families based  
1046 on pairwise similarity. *Bioinformatics* 20, 3702–3704 (2004).

- 1047 94. Armenteros, J. J. A. *et al.* SignalP 5.0 improves signal peptide predictions using deep  
1048 neural networks. *Nat Biotechnol* 37, 420–423 (2019).
- 1049 95. Southey, B. R., Rodriguez-Zas, S. L. & Sweedler, J. V. Prediction of neuropeptide  
1050 prohormone cleavages with application to RFamides. *Peptides* 27, 1087–1098 (2006).
- 1051 96. Capella-Gutiérrez, S., Silla-Martínez, J. M. & Gabaldon, T. trimAl: a tool for automated  
1052 alignment trimming in large-scale phylogenetic analyses. *Bioinformatics* 25, 1972–1973  
1053 (2009).
- 1054 97. Nguyen, L.-T., Schmidt, H. A., Haeseler, A. von & Minh, B. Q. IQ-TREE: A fast and  
1055 effective stochastic algorithm for estimating Maximum-Likelihood phylogenies. *Mol Biol*  
1056 *Evol* 32, 268–274 (2015).
- 1057 98. Simakov, O. *et al.* Hemichordate genomes and deuterostome origins. *Nature* 527, 459–  
1058 465 (2015).
- 1059 99. Cherif--Feildel, M., Berthelin, C. H., Rivière, G., Favrel, P. & Kellner, K. Data for  
1060 evolutive analysis of insulin related peptides in bilaterian species. *Data Brief* 22, 546–550  
1061 (2019).
- 1062 100. Thiel, D., Franz-Wachtel, M., Aguilera, F. & Hejnol, A. Changes in the neuropeptide  
1063 complement correlate with nervous system architectures in xenacoelomorphs. 1–57 (2018)  
1064 doi:10.1101/265579.
- 1065 101. Roch, G. J. & Sherwood, N. M. Glycoprotein hormones and their receptors emerged at  
1066 the origin of metazoans. *Genome Biol Evol* 6, 1466–79 (2014).
- 1067 102. Oliveira, A. L. de, Calcino, A. & Wanninger, A. Ancient origins of arthropod moulting  
1068 pathway components. *elife* 8, e46113 (2019).
- 1069 103. Smýkal, V. *et al.* Complex evolution of insect insulin receptors and homologous decoy  
1070 receptors, and functional significance of their multiplicity. *Mol Biol Evol* 37, 1775–1789  
1071 (2020).
- 1072 104. Steinegger, M. & Söding, J. MMseqs2 enables sensitive protein sequence searching for  
1073 the analysis of massive data sets. *Nat Biotechnol* 35, 1026–1028 (2017).
- 1074 105. Wang, Y. *et al.* MCSanX: a toolkit for detection and evolutionary analysis of gene  
1075 synteny and collinearity. *Nucleic Acids Research* 40, e49–e49 (2012).
- 1076 106. Warren, R. L. *et al.* LINKS: Scalable, alignment-free scaffolding of draft genomes with  
1077 long reads. *Gigascience* 4, 35 (2015).
